# Supplementary material for: An integrated and homogenized global surface solar radiation dataset and its reconstruction based on an artificial intelligence approach
Source: Copernicus journal article supplement (doi:10.5194/essd-2023-178), 2023-05-22
Supplement: Supplementary file 1 [file essd-2023-178-supplement.zip]

Archive with 2 entries (2 files):
- Jiao et al_SI.pdf
- Table S2 Station_Information.xlsx
