# Supplementary material for: An integrated and homogenized global surface solar radiation dataset and its reconstruction based on an artificial intelligence approach
Source: Copernicus journal article supplement (doi:10.5194/essd-2023-178), 2023-05-22
Supplement: Supplementary file 1 [file essd-2023-178-supplement.zip › Jiao et al_SI.pdf]

## Supplemental Material to

### ‘An integrated and homogenized global SSR dataset and its reconstruction based on artificial intelligence approach’

5

Boyang Jiao<sup>1,#</sup>, Yucheng Su<sup>2</sup>, Qingxiang Li<sup>\*1,#</sup>, Veronica Manara<sup>3</sup>, Martin Wild<sup>4</sup>

<sup>1</sup>School of Atmospheric Sciences, Sun Yat-sen University, and Key Laboratory of Tropical Atmosphere–Ocean System, Ministry of Education, Zhuhai 519082, China

10 <sup>2</sup>Meteorological Bureau of Zhuhai, Zhuhai 519082, China

<sup>3</sup>Department of Environmental Science and Policy, Università degli Studi di Milano, via Celoria 10, 20133, Milano, Italy

<sup>4</sup>Institute for Atmospheric and Climate Science, ETH Zurich, Zurich, Switzerland

<sup>#</sup>Southern Laboratory of Ocean Science and Engineering (Guangdong Zhuhai), Zhuhai 519082, China

15 *Correspondence to:* Qingxiang Li ([liqingx5@mail.sysu.edu.cn](mailto:liqingx5@mail.sysu.edu.cn))

#### **The SI file contains:**

1 Text (S1)

1 Table (S1)

7 Figures (S1(1-11), S2, S3, S4, S5, S6 (1-16), and S7)

20

**Text S1 Convolutional Neural Network (CNN) deep learning model (convolutional layer, loss function)**

25 Convolutional layer using partial convolution and mask update: The partial convolution operation and the mask update function are called the partial convolution layer (Liu et al., 2018). The partial convolution operation and the mask update function are called the partial convolution layer. The partial convolution at each position can be expressed as

$$x' = \begin{cases} W^T \left( X \odot M \right) \frac{\text{sum}(1)}{\text{sum}(M)} + b, & \text{if } \text{sum}(M) > 0 \\ 0, & \text{otherwise} \end{cases} \quad (1)$$

$\odot$  denotes element-by-element multiplication, where 1 and  $M$  in the above equation have the same shape, and all elements in 1 are 1. Eq. (1) illustrates that our output value depends only on the valid input and that  $\frac{\text{sum}(1)}{\text{sum}(M)}$  is used to adjust the amount of change in the valid value of the input.

$$m' = \begin{cases} 1, & \text{if } \text{sum}(M) > 0 \\ 0, & \text{otherwise} \end{cases} \quad (2)$$

After each partial convolution operation, use equation (2) to update the mask Eq. (2) indicates that we mark that position as valid whenever the convolution can adjust its output according to at least one valid value. In other words, marking 1 where there is a value and 0 for the default part is the so-called binary mask. This approach can be implemented in any deep learning structure as part of a forward delivery. With enough partial convolutions, the input values will all eventually become valid, i.e., any masks will all become 1. Partial convolution layers can be implemented by extending the existing standard Pytorch library. The most straightforward implementation is to define a binary mask of the shape  $C \times H \times W$  that is the same size as its associated image and feature values. And then, update the mask using a fixed convolutional layer of the same size and operation as the partial convolutional layer, with the same weight (weight of 1) and no bias.

The model loss function is set for each pixel reconstruction accuracy and the transition smoothness of the repaired missing measurements to their surroundings. Let the input image be  $I_i$ , the initial binary mask be  $M$ , the predicted value be  $I_{out}$ , and the actual value be  $I_{gt}$ . Eq. (3) and Eq. (4) calculate the loss value for each pixel, where Eq. (3) calculates the default value portion of the loss value and Eq. (4) calculates the actual value portion of the loss value.

$$\mathcal{L}_{hole} = ||(1 - M) \odot (I_{out} - I_{gt})||_1 \quad (3)$$

$$\mathcal{L}_{valid} = ||M \odot (I_{out} - I_{gt})||_1 \quad (4)$$

Define the Perceptual Loss function (Eq. (5)) and the Style Loss function (Eq. (6) and (7)). Where  $I_{comp}$  denotes the original data, where the valid value is the true value and  $K_n$  denotes the normalization factor.

$$\mathcal{L}_{perceptual} = \sum_{n=0}^{N-1} ||\Psi_n(I_{out}) - \Psi_n(I_{gt})||_1 + \sum_{n=0}^{N-1} ||\Psi_n(I_{comp}) - \Psi_n(I_{gt})||_1 \quad (5)$$

$$\mathcal{L}_{style_{out}} = \sum_{n=0}^{N-1} ||K_n((\Psi_n(I_{out}))^T(\Psi_n(I_{out})) - (\Psi_n(I_{gt}))^T(\Psi_n(I_{gt})))||_1 \quad (6)$$

$$\mathcal{L}_{style_{comp}} = \sum_{n=0}^{N-1} ||K_n((\Psi_n(I_{comp}))^T(\Psi_n(I_{comp})) - (\Psi_n(I_{gt}))^T(\Psi_n(I_{gt})))||_1 \quad (7)$$

50 Finally, the Total Variation Loss function is defined in equation (8). This loss function effectively smoothes the image, reducing the total variation of the signal and removing unwanted details while retaining essential details such as edges.

$$\mathcal{L}_{tv} = \sum_{(i,j) \in P, (i,j+1) \in P} ||I_{comp}^{i,j+1} - I_{comp}^{i,j}||_1 + \sum_{(i,j) \in P, (i+1,j) \in P} ||I_{comp}^{i+1,j} - I_{comp}^{i,j}||_1 \quad (8)$$

The final loss function equation (9) is constructed by combining all the loss functions necessary for image restoration, and a validation set of 100 images confirms this equation's hyperparameters.

$$\mathcal{L}_{total} = \mathcal{L}_{valid} + 6\mathcal{L}_{hole} + 0.05\mathcal{L}_{perceptual} + 120(\mathcal{L}_{style_{out}} + \mathcal{L}_{style_{comp}}) + 0.1\mathcal{L}_{tv} \quad (9)$$

55

**Table S1: CMIP6 numerical models for training the neural network. CMIP6 Historical monthly experiments between 1955 and 2014 are applied to train the CMIP6-AI.**

|   | Source ID     | N° | Ensemble                                                                                     |
|---|---------------|----|----------------------------------------------------------------------------------------------|
| 1 | ACCESS-ESM1-5 | 40 | r1i1p1f1-r40i1p1f1                                                                           |
| 2 | CNRM-CM6-1    | 30 | r1i1p1f2-r30i1p1f2                                                                           |
| 3 | CNRM-ESM2-1   | 11 | r1i1p1f2-r11i1p1f2                                                                           |
| 4 | EC-Earth3     | 22 | r1i1p1f1-r4i1p1f1; r6i1p1f1; r7i1p1f1; r9i1p1f1;<br>r10i1p1f1-r19i1p1f1; r21i1p1f1-r25i1p1f1 |
| 5 | EC-Earth3-CC  | 10 | r1i1p1f1; r4i1p1f1; r6i1p1f1-r13i1p1f1                                                       |
| 6 | MRI-ESM2-0    | 12 | r1i1p1f1-r10i1p1f1; r1i2p1f1; r1i1000p1f1                                                    |

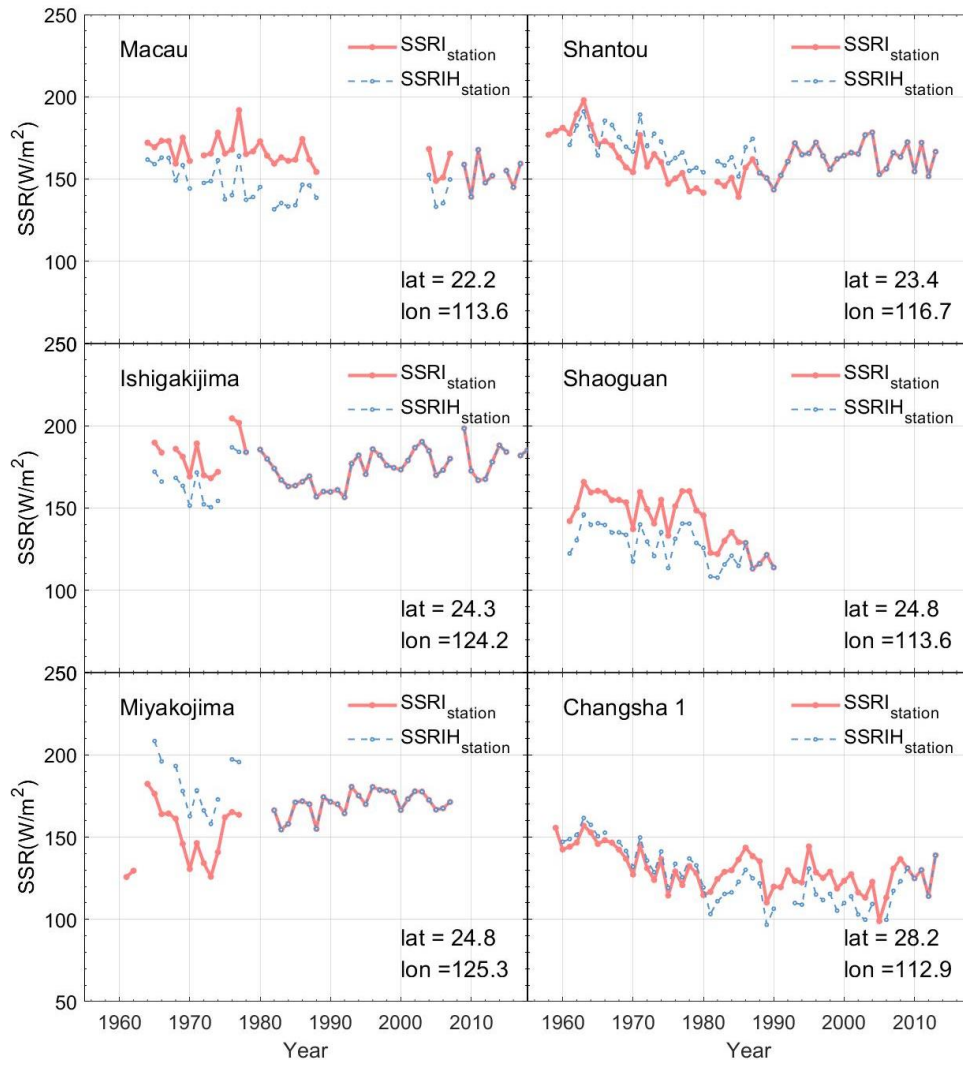

60 **Figure S1-1 Annual variation of SSR calculated from the original station SSR series (SSRI<sub>station</sub>, blue line), the station SSR series after homogenization (SSRIH<sub>station</sub>, red line).**

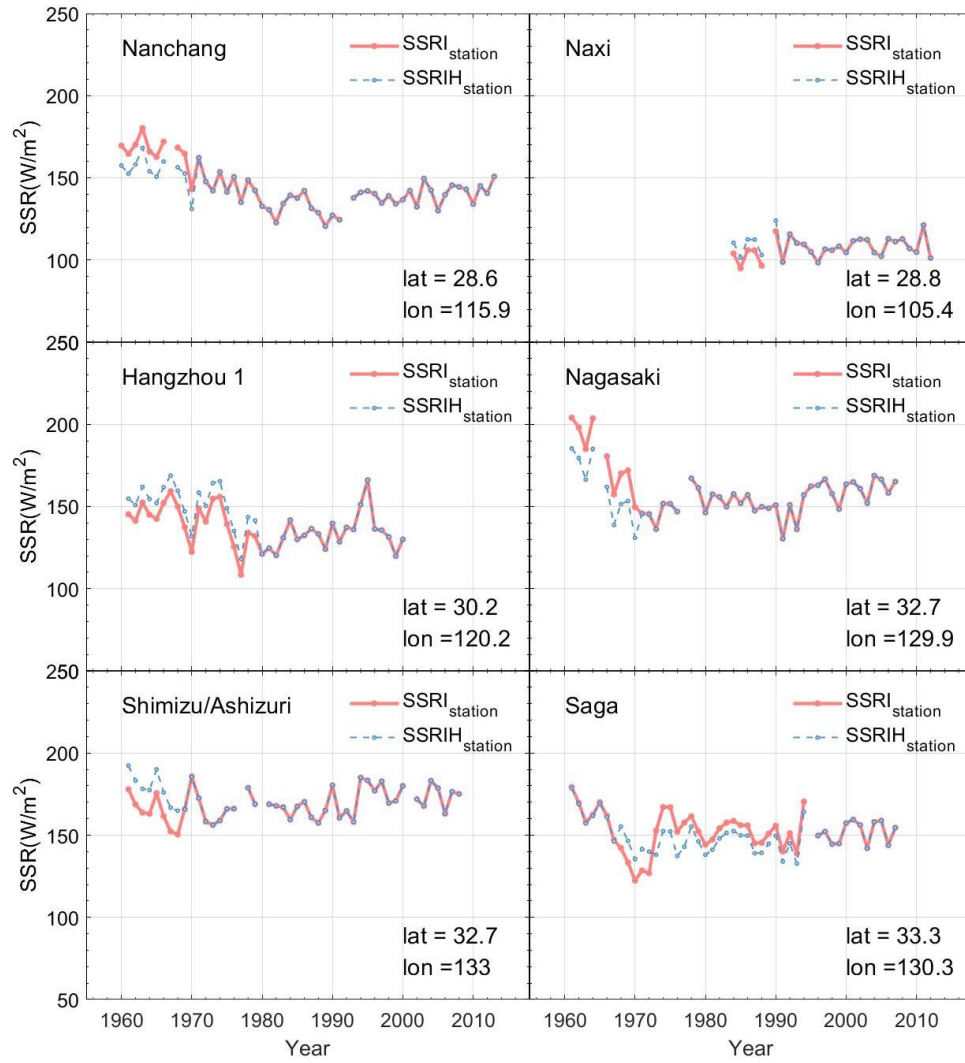

**Figure S1-2 Annual variation of SSR calculated from the original station SSR series (SSRI<sub>station</sub>, blue line), the station SSR series after homogenization (SSRIH<sub>station</sub>, red line).**

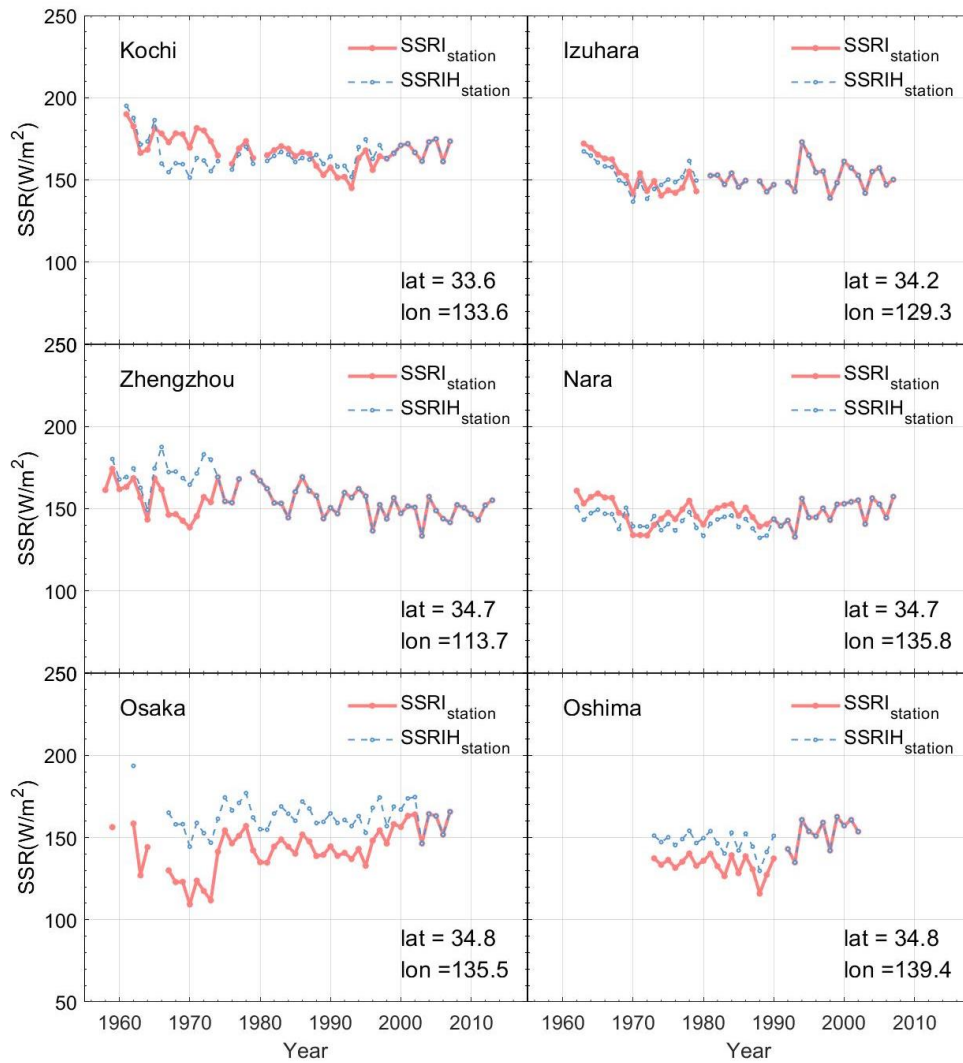

65

**Figure S1-3 Annual variation of SSR calculated from the original station SSR series ( $SSRI_{station}$ , blue line), the station SSR series after homogenization ( $SSRIH_{station}$ , red line).**

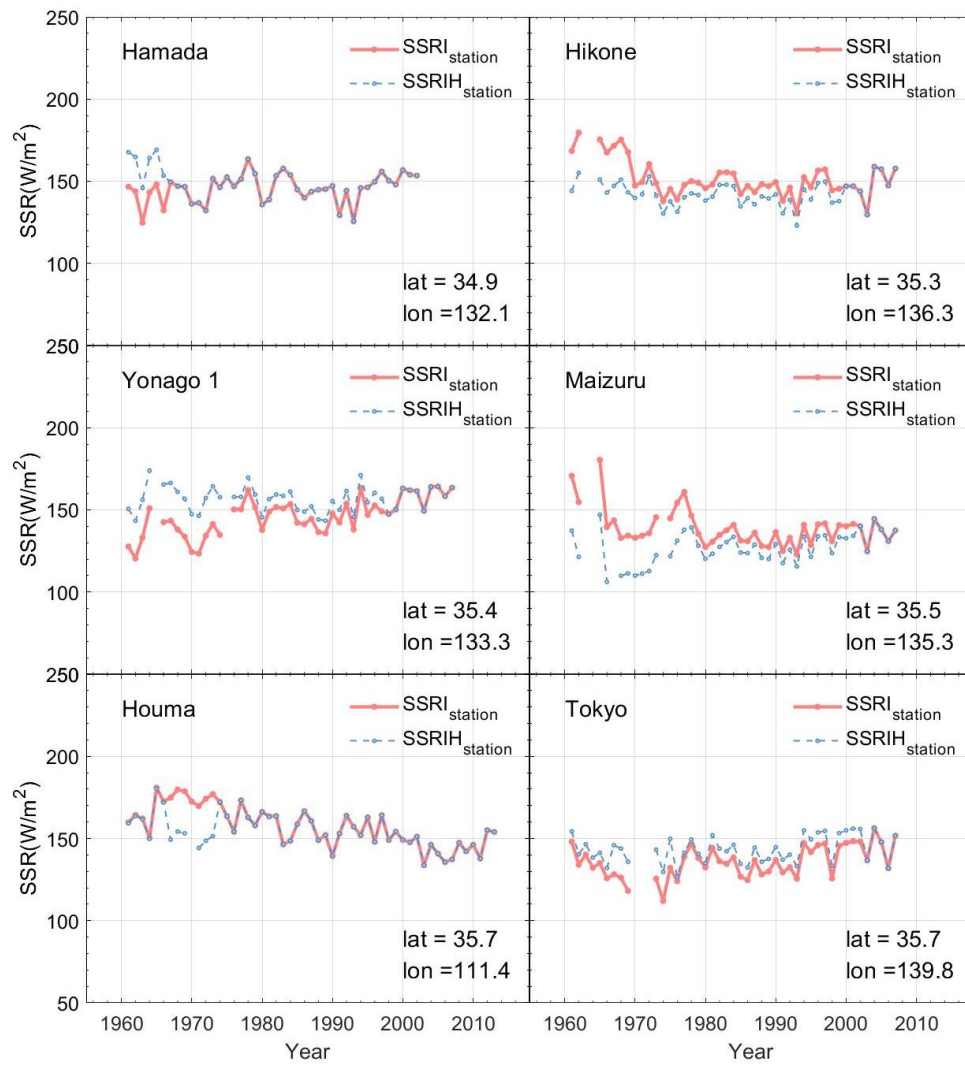

**Figure S1-4 Annual variation of SSR calculated from the original station SSR series (SSRI<sub>station</sub>, blue line), the station SSR series after homogenization (SSRIH<sub>station</sub>, red line).**

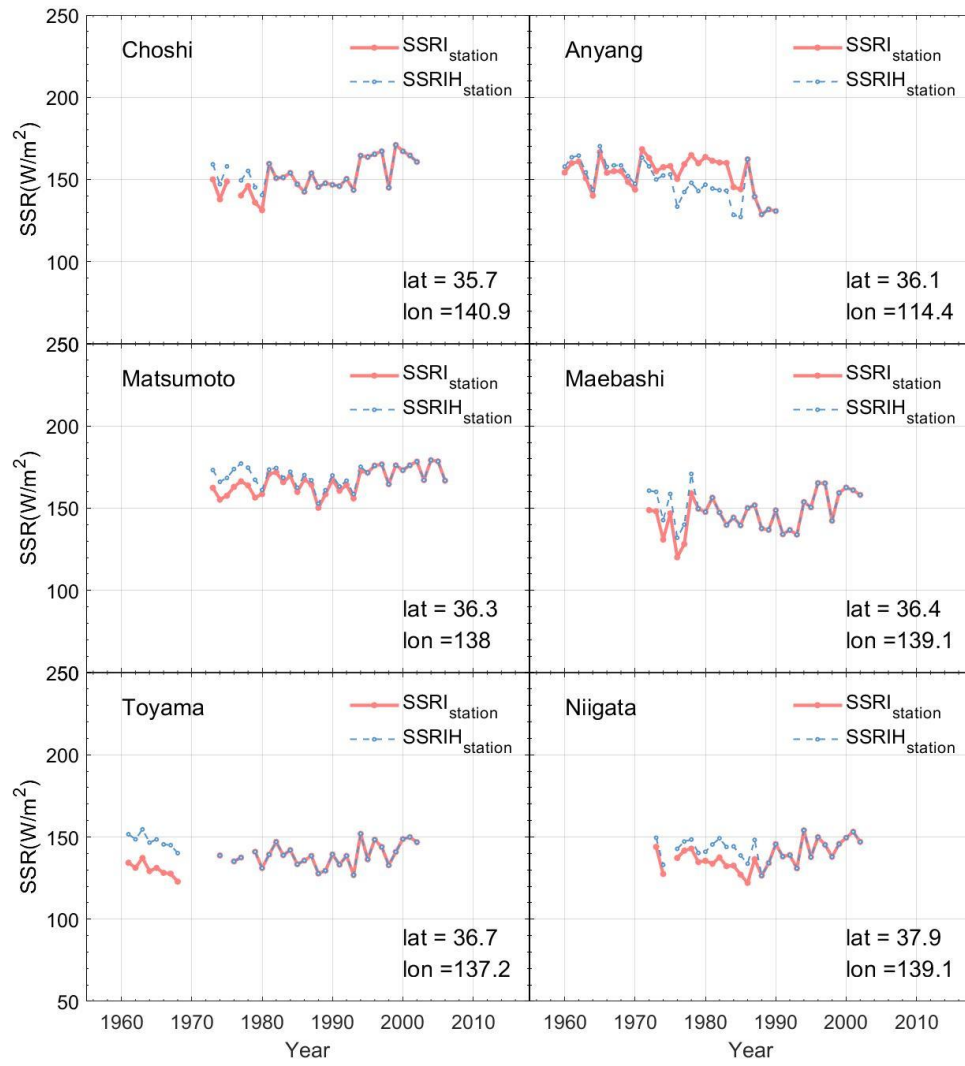

**Figure S1-5 Annual variation of SSR calculated from the original station SSR series (SSRI<sub>station</sub>, blue line), the station SSR series after homogenization (SSRIH<sub>station</sub>, red line).**

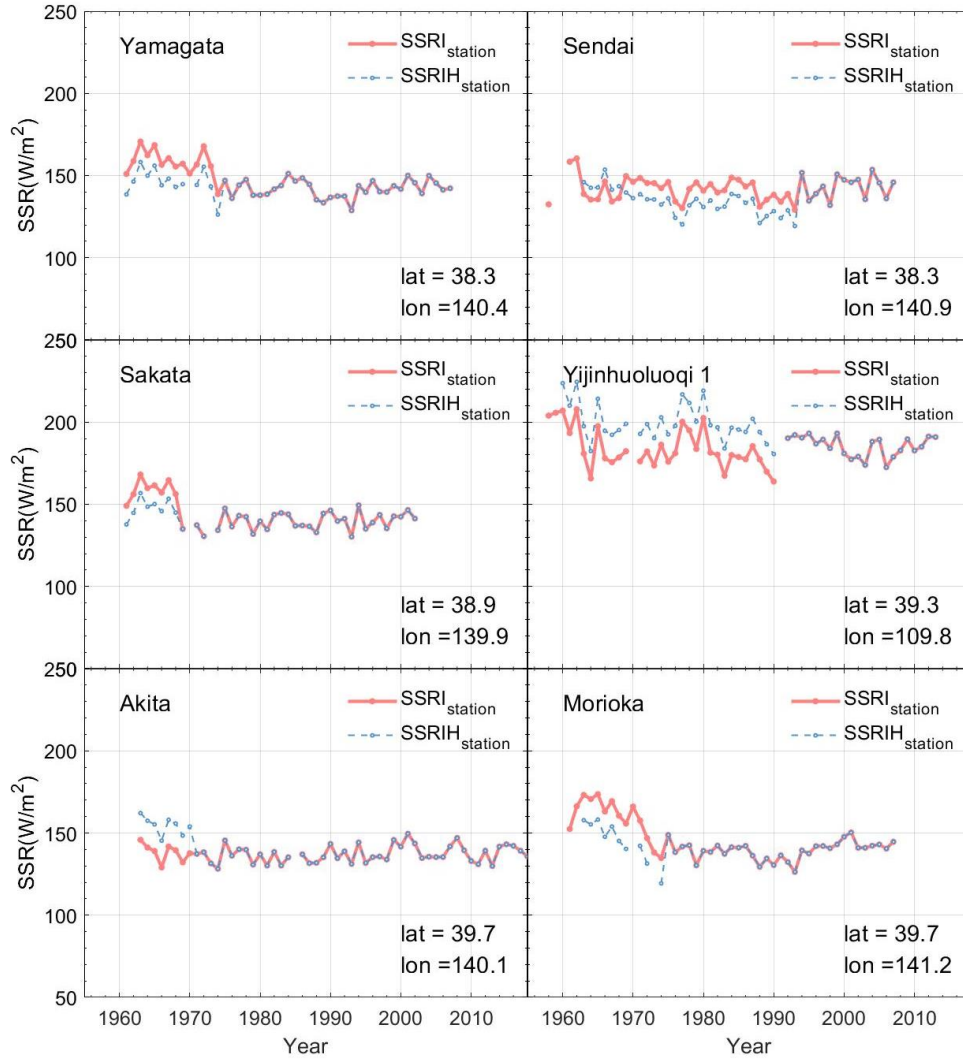

75 **Figure S1-6 Annual variation of SSR calculated from the original station SSR series (SSRI<sub>station</sub>, blue line), the station SSR series after homogenization (SSRIH<sub>station</sub>, red line).**

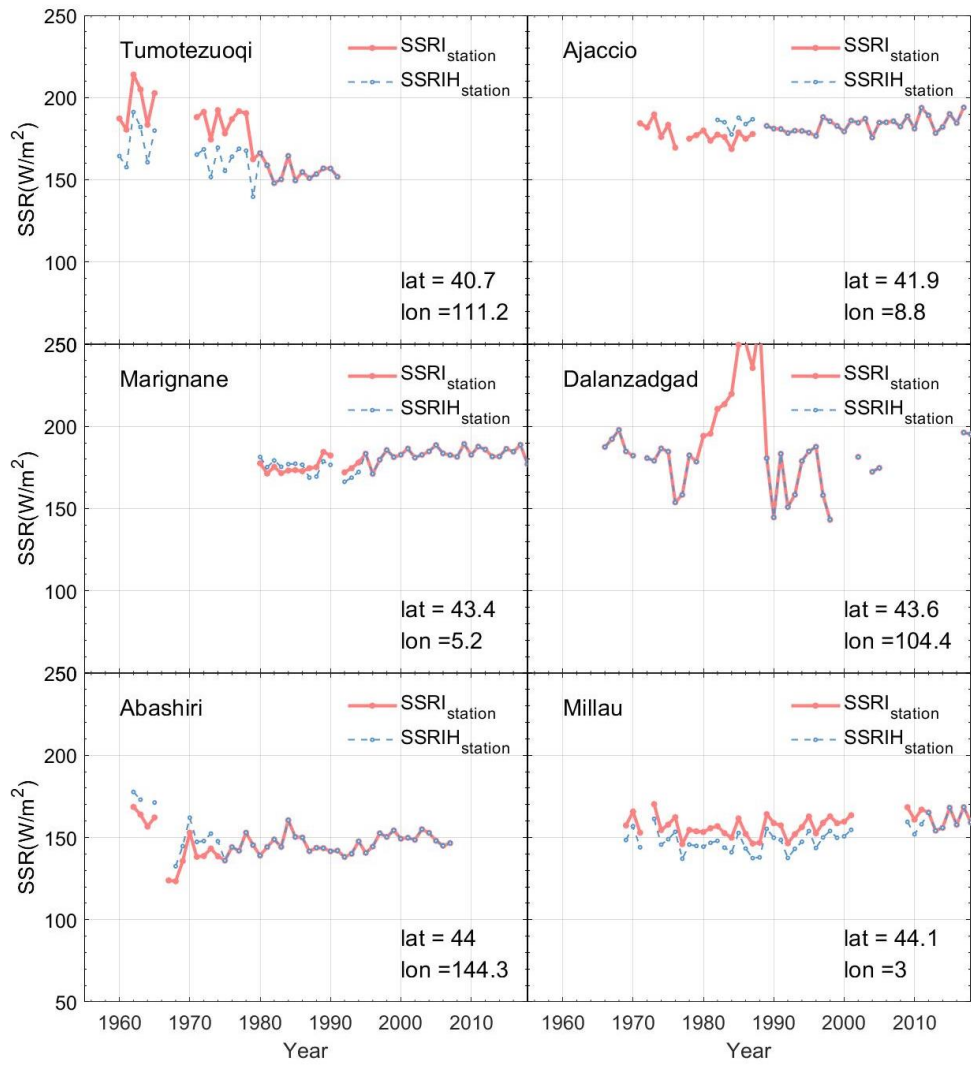

**Figure S1-7 Annual variation of SSR calculated from the original station SSR series (SSRI<sub>station</sub>, blue line), the station SSR series after homogenization (SSRIH<sub>station</sub>, red line).**

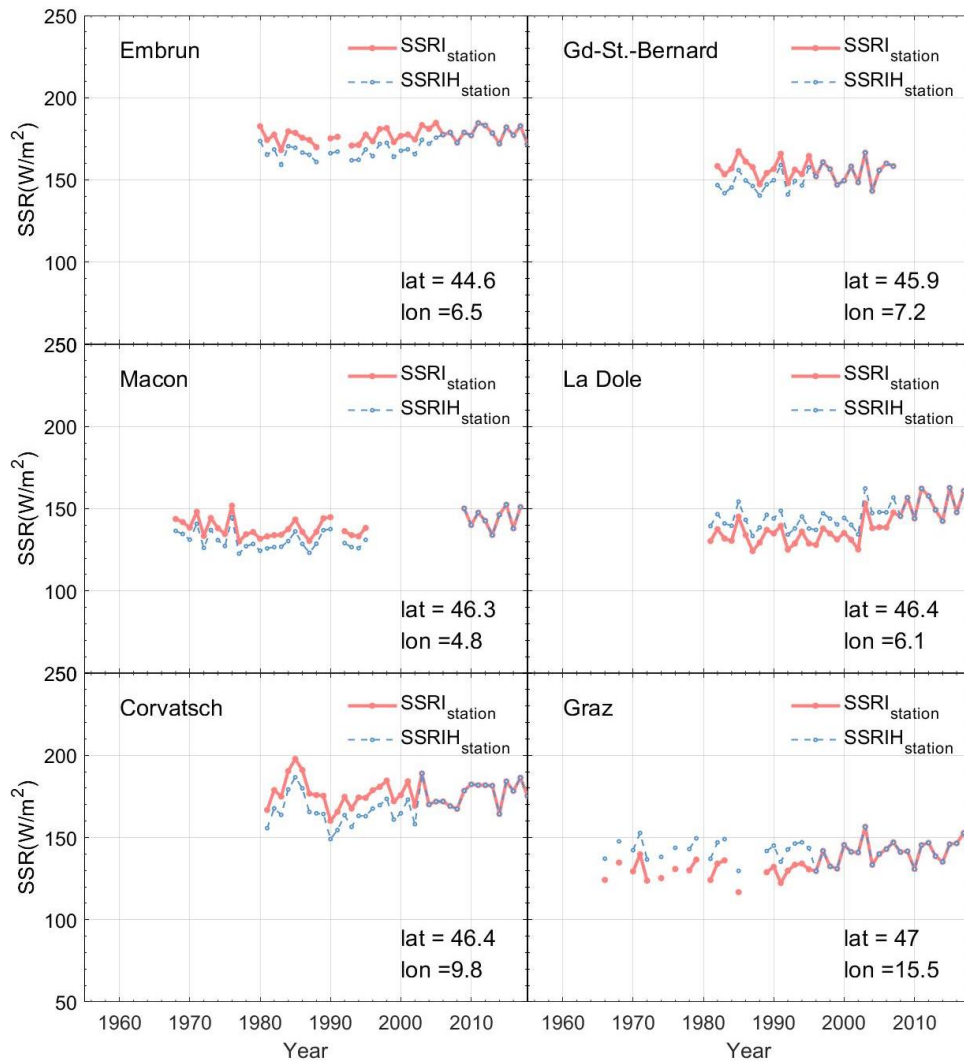

80

**Figure S1-8 Annual variation of SSR calculated from the original station SSR series (SSRI<sub>station</sub>, blue line), the station SSR series after homogenization (SSRIH<sub>station</sub>, red line).**

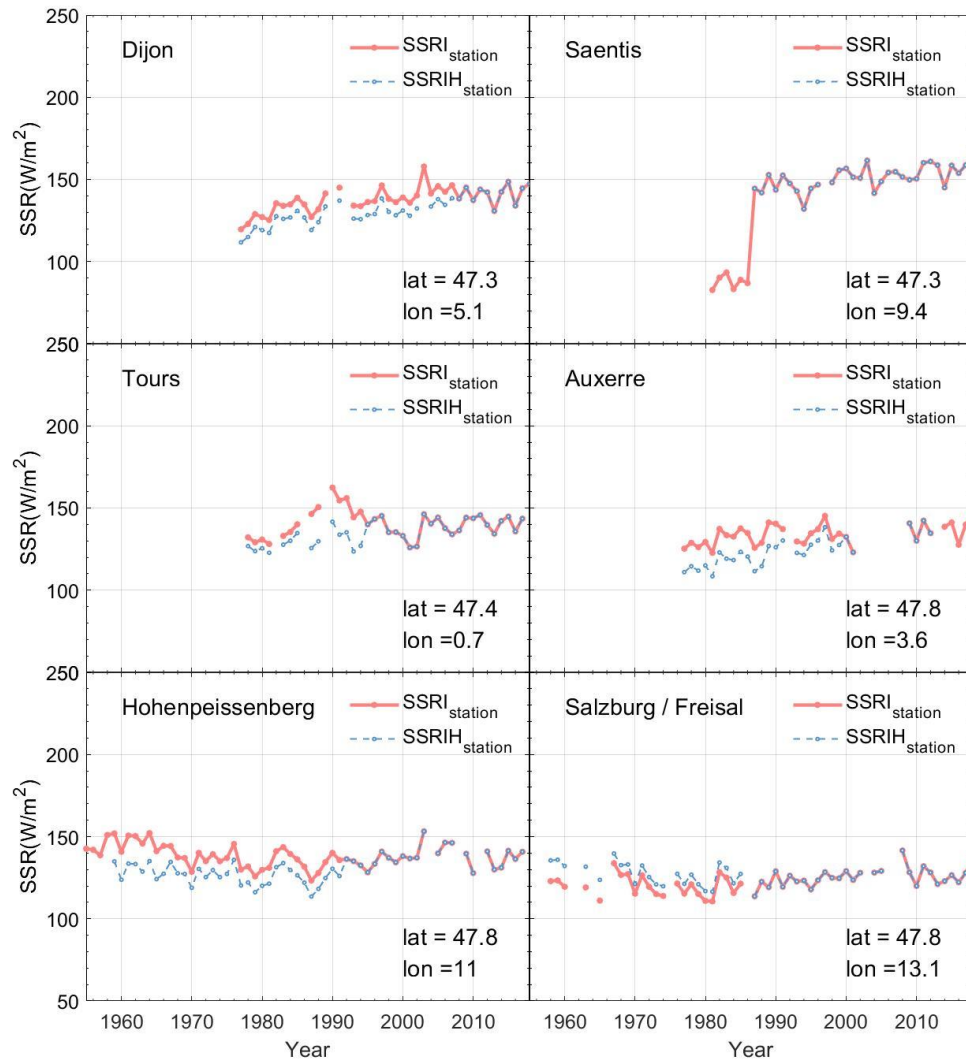

**Figure S1-9 Annual variation of SSR calculated from the original station SSR series (SSRI<sub>station</sub>, blue line), the station SSR series after homogenization (SSRIH<sub>station</sub>, red line).**

85

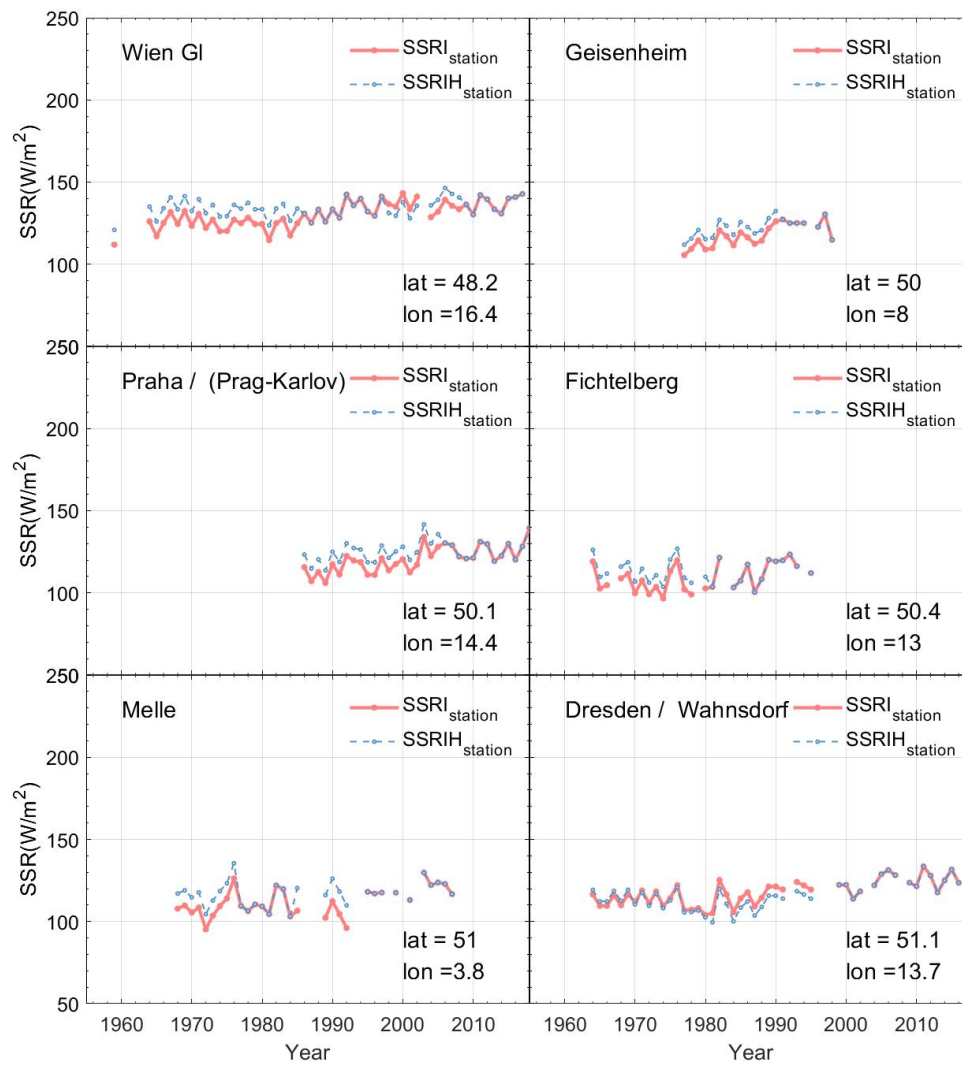

**Figure S1-10 Annual variation of SSR calculated from the original station SSR series (SSRI<sub>station</sub>, blue line), the station SSR series after homogenization (SSRIH<sub>station</sub>, red line).**

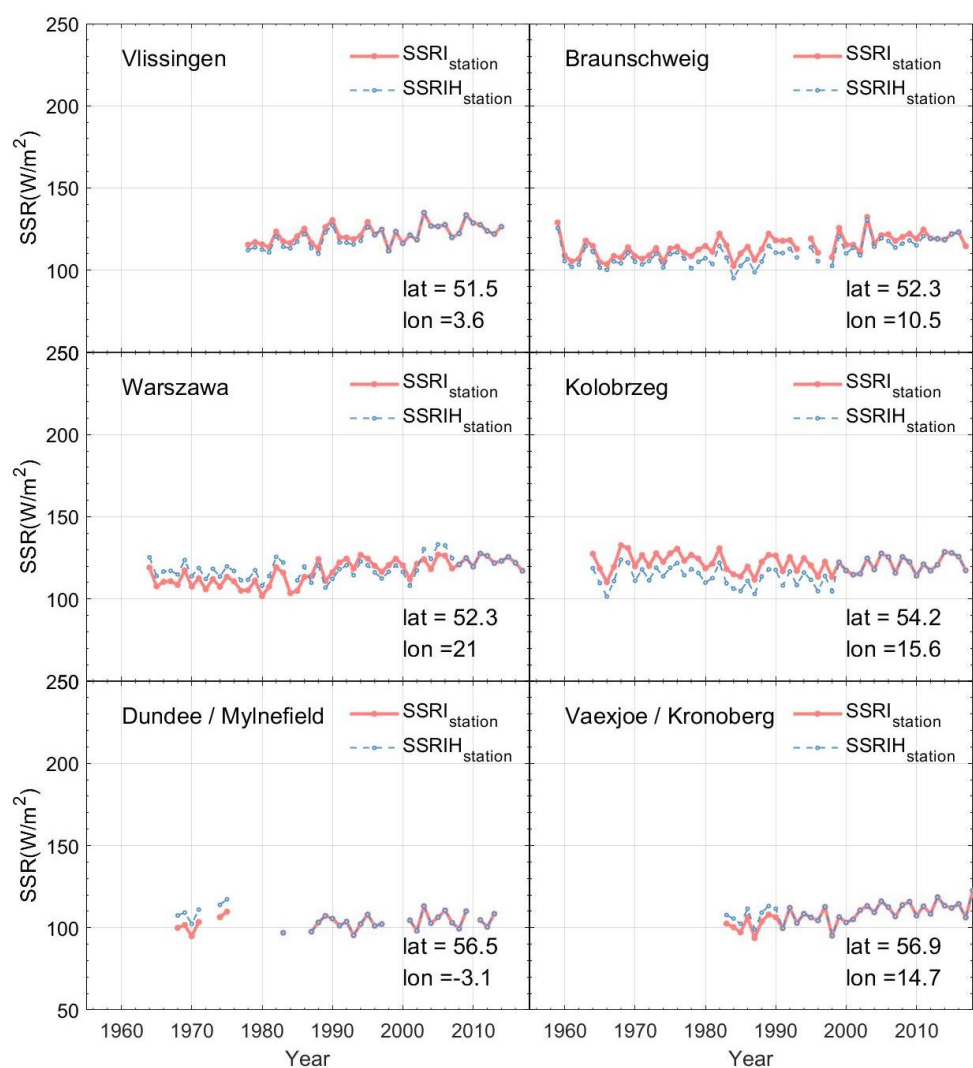

90 **Figure S1-11 Annual variation of SSR calculated from the original station SSR series (SSRI<sub>station</sub>, blue line), the station SSR series after homogenization (SSRIH<sub>station</sub>, red line).**

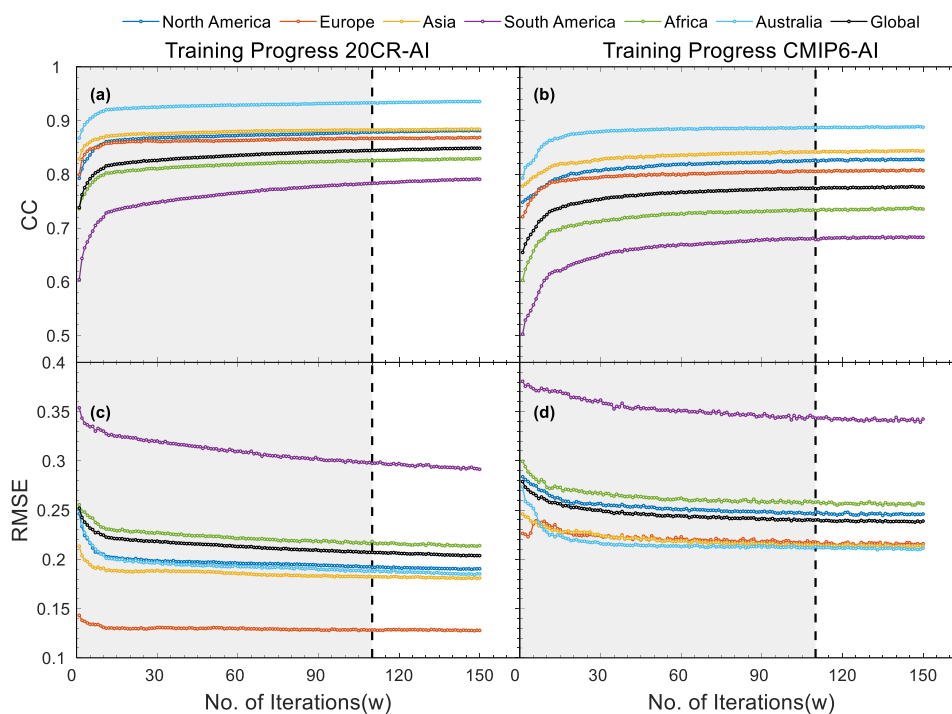

**Figure S2: 20CR-AI (CMIP6-AI) reconstruction model evaluation. Figure S3 (a/b) and (c/d) show the correlation coefficient (CC) and root mean squared error (RMSE) of the 20crAI/CMIP6AI model reconstruction results with the validation set for the different number of iterations.**

95

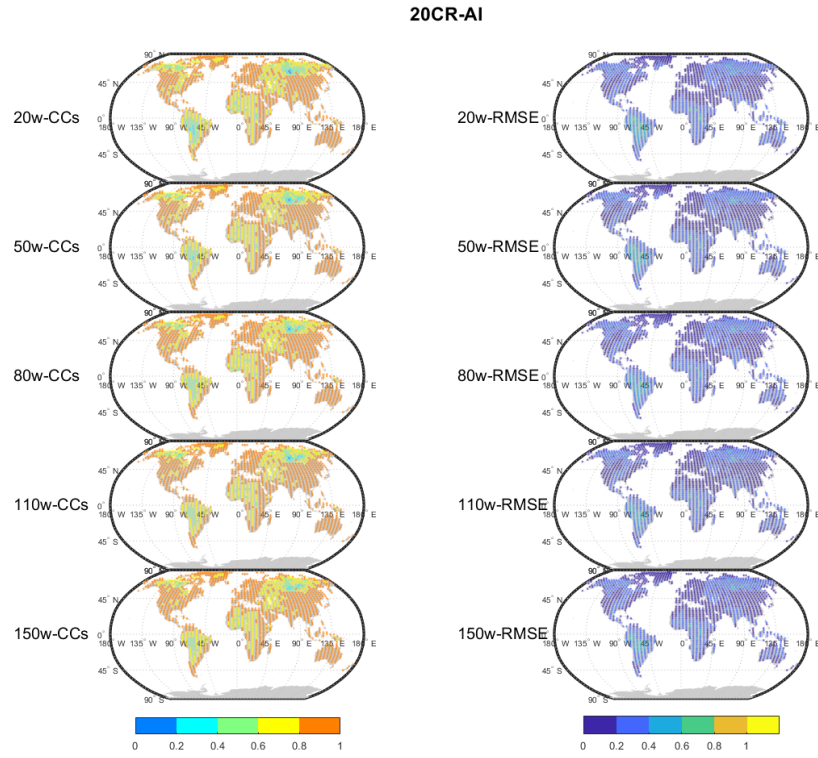

**Figure S3: 20CR-AI reconstruction model evaluation.** The left and right panels show the spatial distribution of the CC and the RMSE of the 20CR-AI model reconstruction results with the 20CR validation set for the different number of iterations, respectively.

100

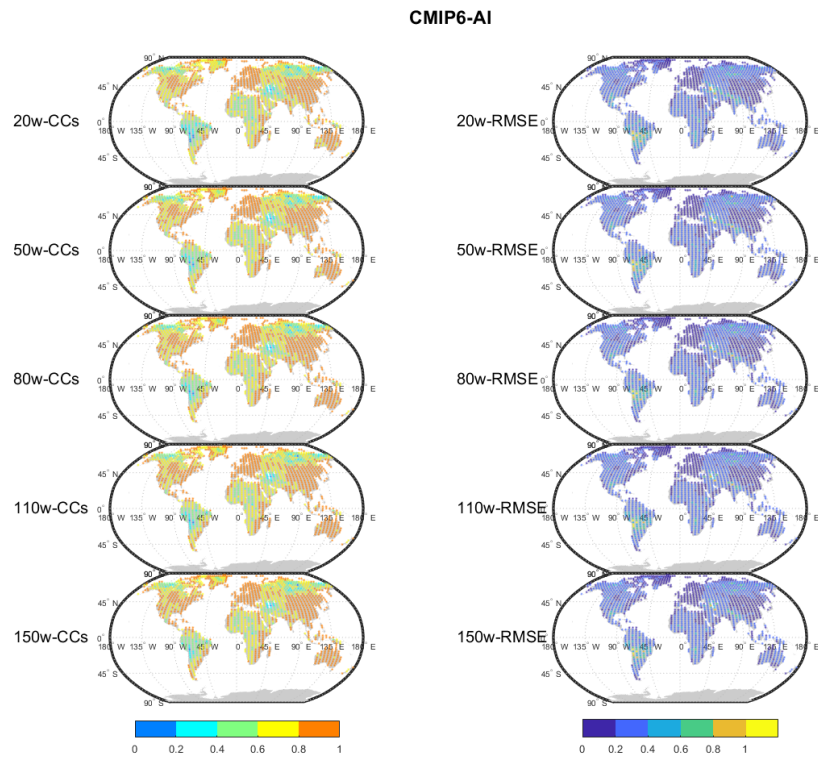

**Figure S4: same as Figure S3, but for CMIP6-AI.**

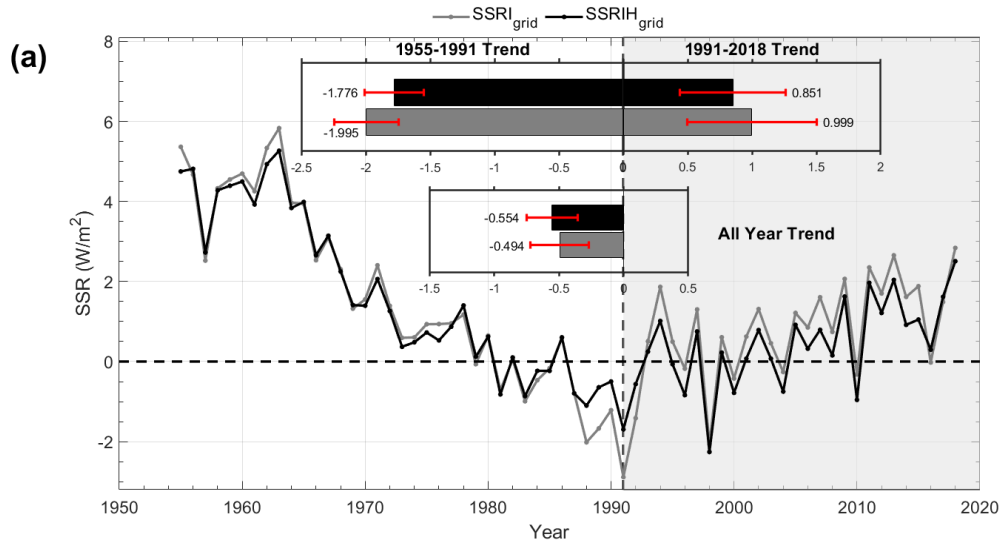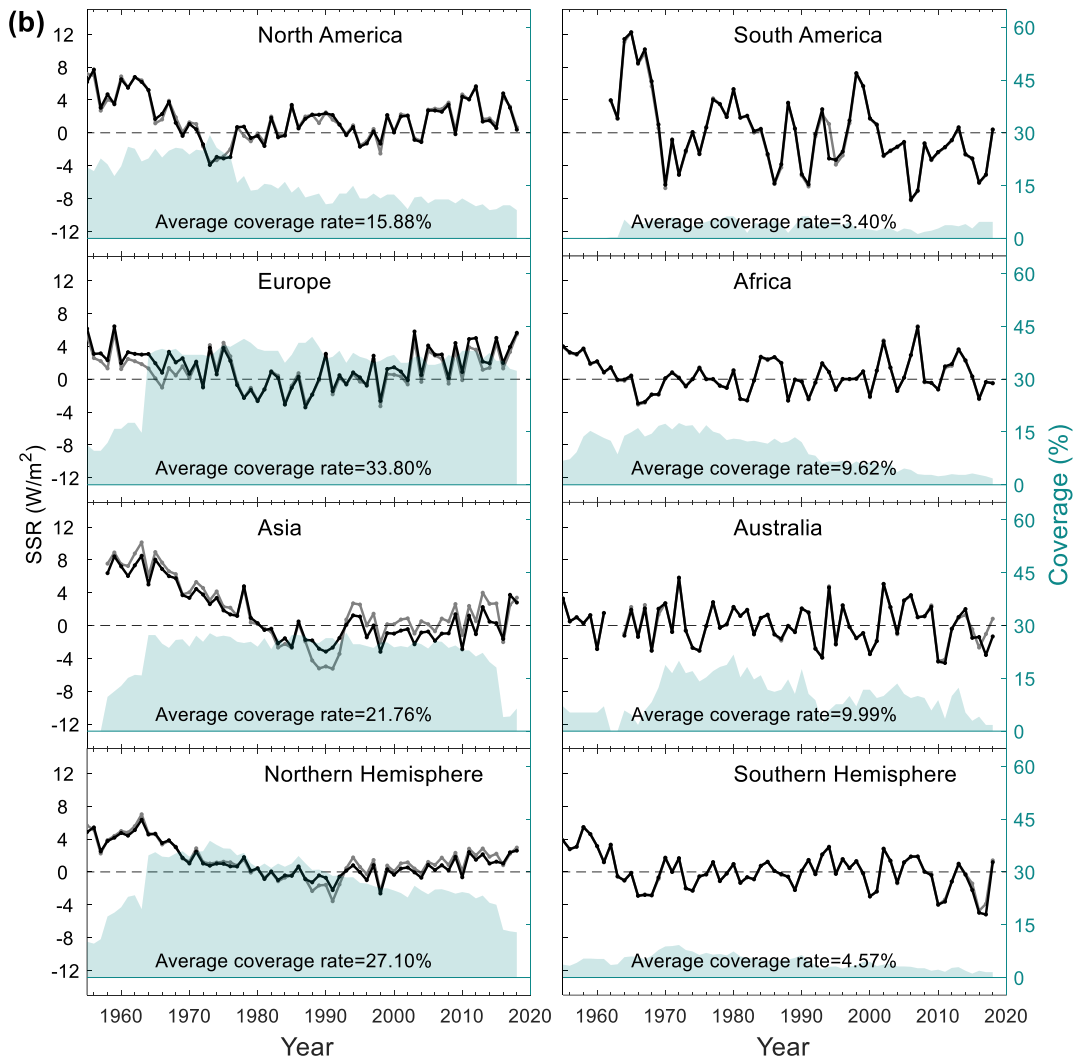

**Figure S5: Time series of the annual global (a) /regional (b) SSR anomaly variations (relative to 1971-2000) before /after homogenization. The Grey /black solid line represents SSR before homogenization (SSRI<sub>grid</sub>)/SSRIH<sub>grid</sub> annual anomalies. The histograms represent the decadal trends of the SSRI<sub>grid</sub> /SSRIH<sub>grid</sub> (unit: W/m<sup>2</sup> per decade) and their 95% uncertainty range during three periods 1955-1988, 1988-2018 and 1955-2018.**

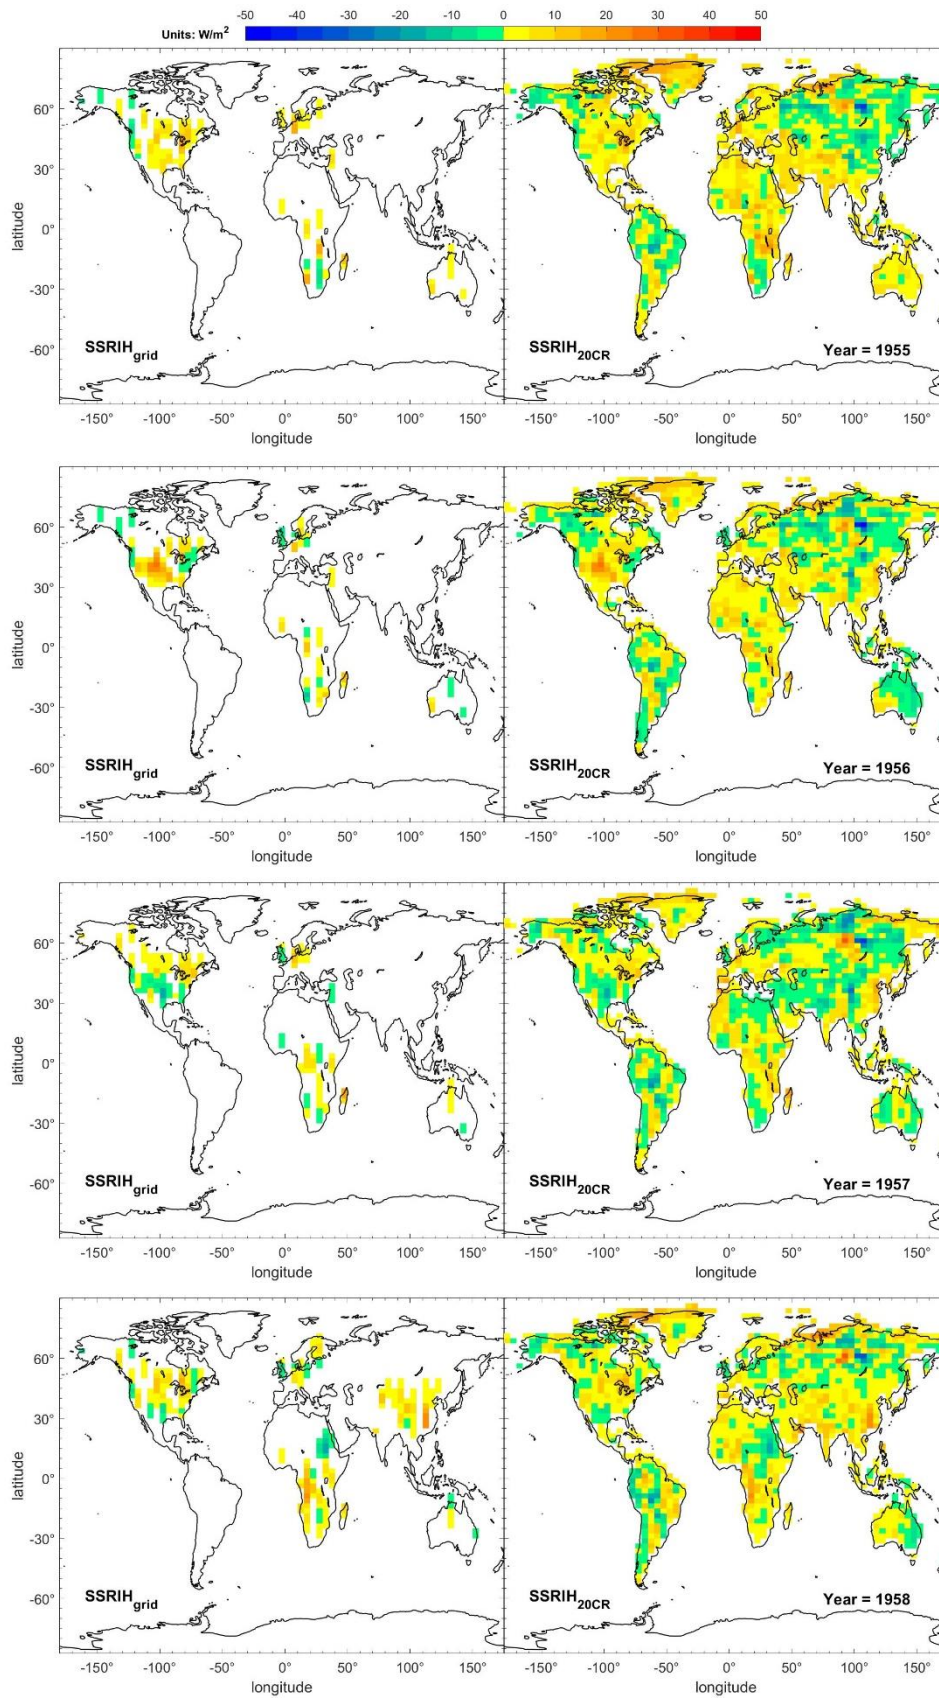

**Figure S6-1: Spatial distribution of SSRIH<sub>grid</sub> (column 1) and the SSR of reconstruction based on the 20CR-AI model (SSRIH<sub>20CR</sub> (column 2)) in typical years (1955-1958).**

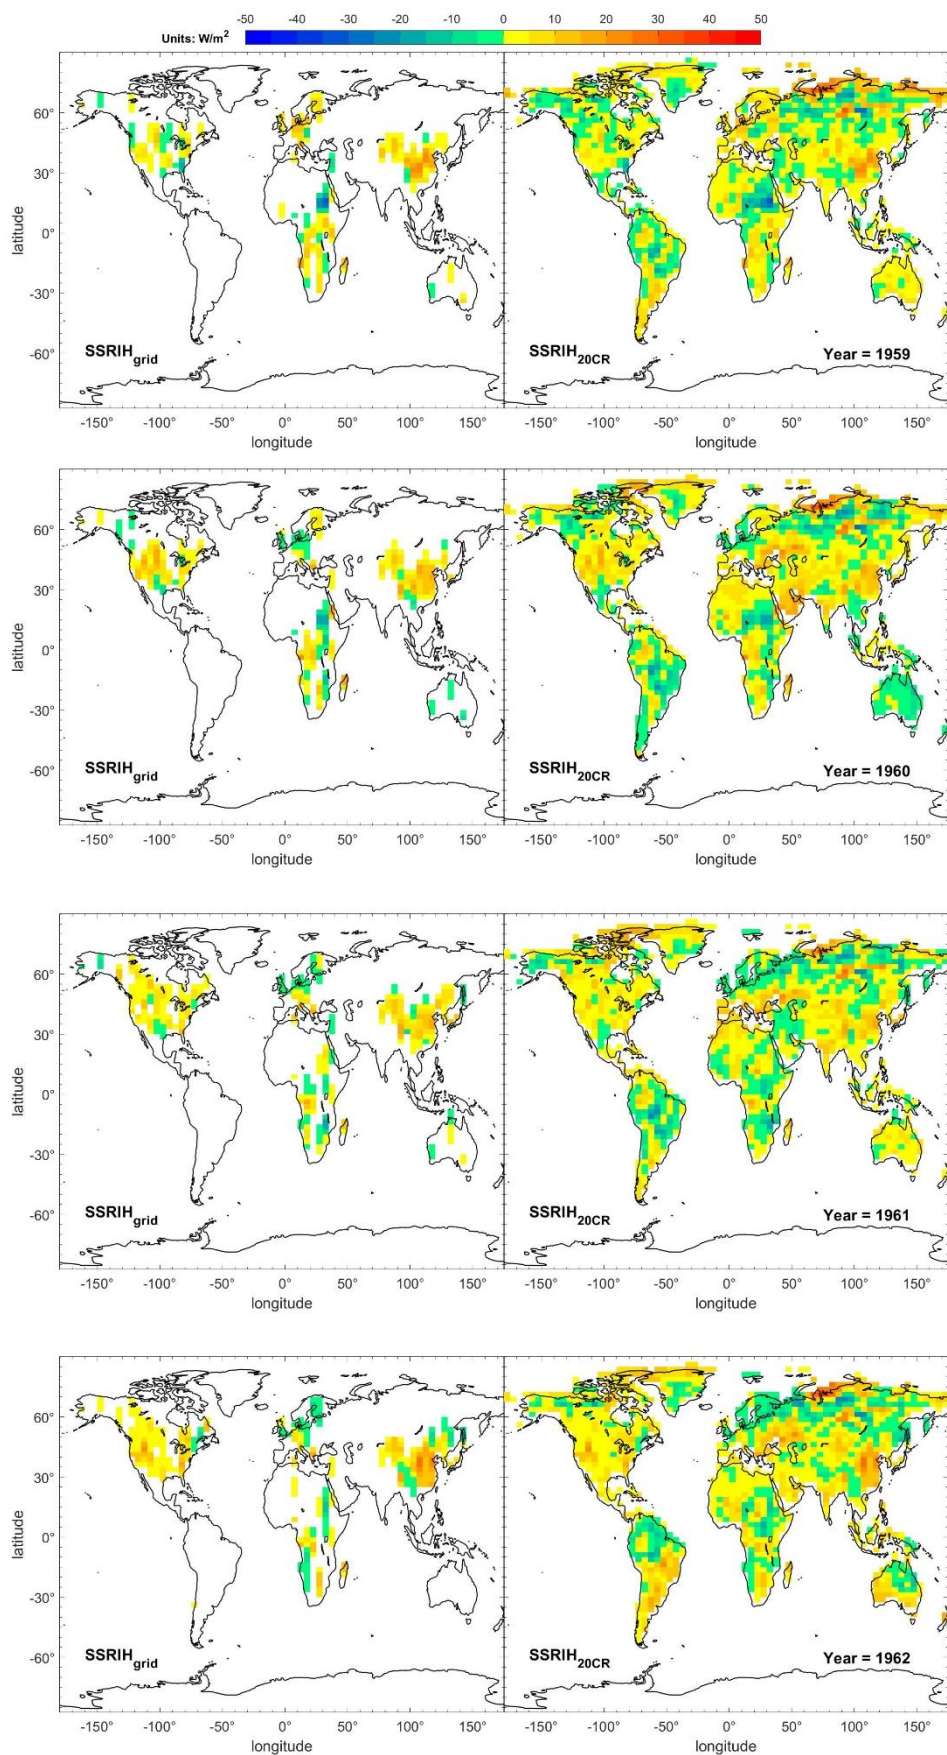

**Figure S6-2: Spatial distribution of SSRIH<sub>grid</sub> (column 1) and SSRIH<sub>20CR</sub> (column 2) in typical years (1959-1962).**

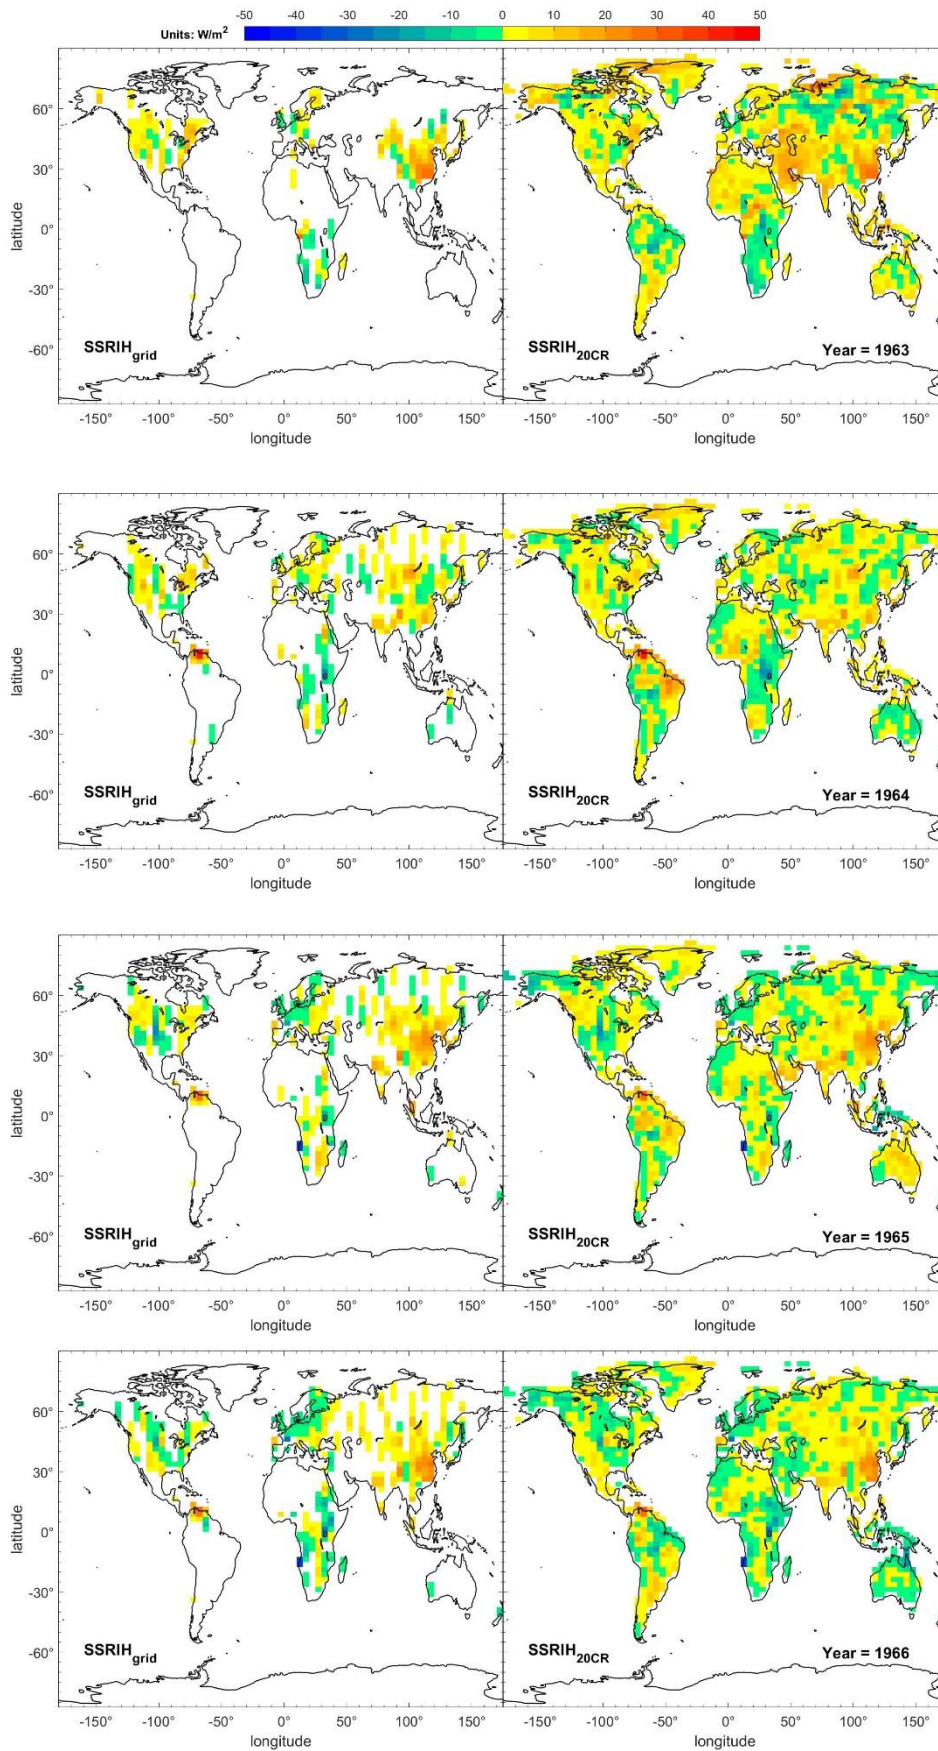

130 **Figure S6-3: Spatial distribution of SSRIH<sub>grid</sub> (column 1) and SSRIH<sub>20CR</sub> (column 2) in typical years (1963-1966).**

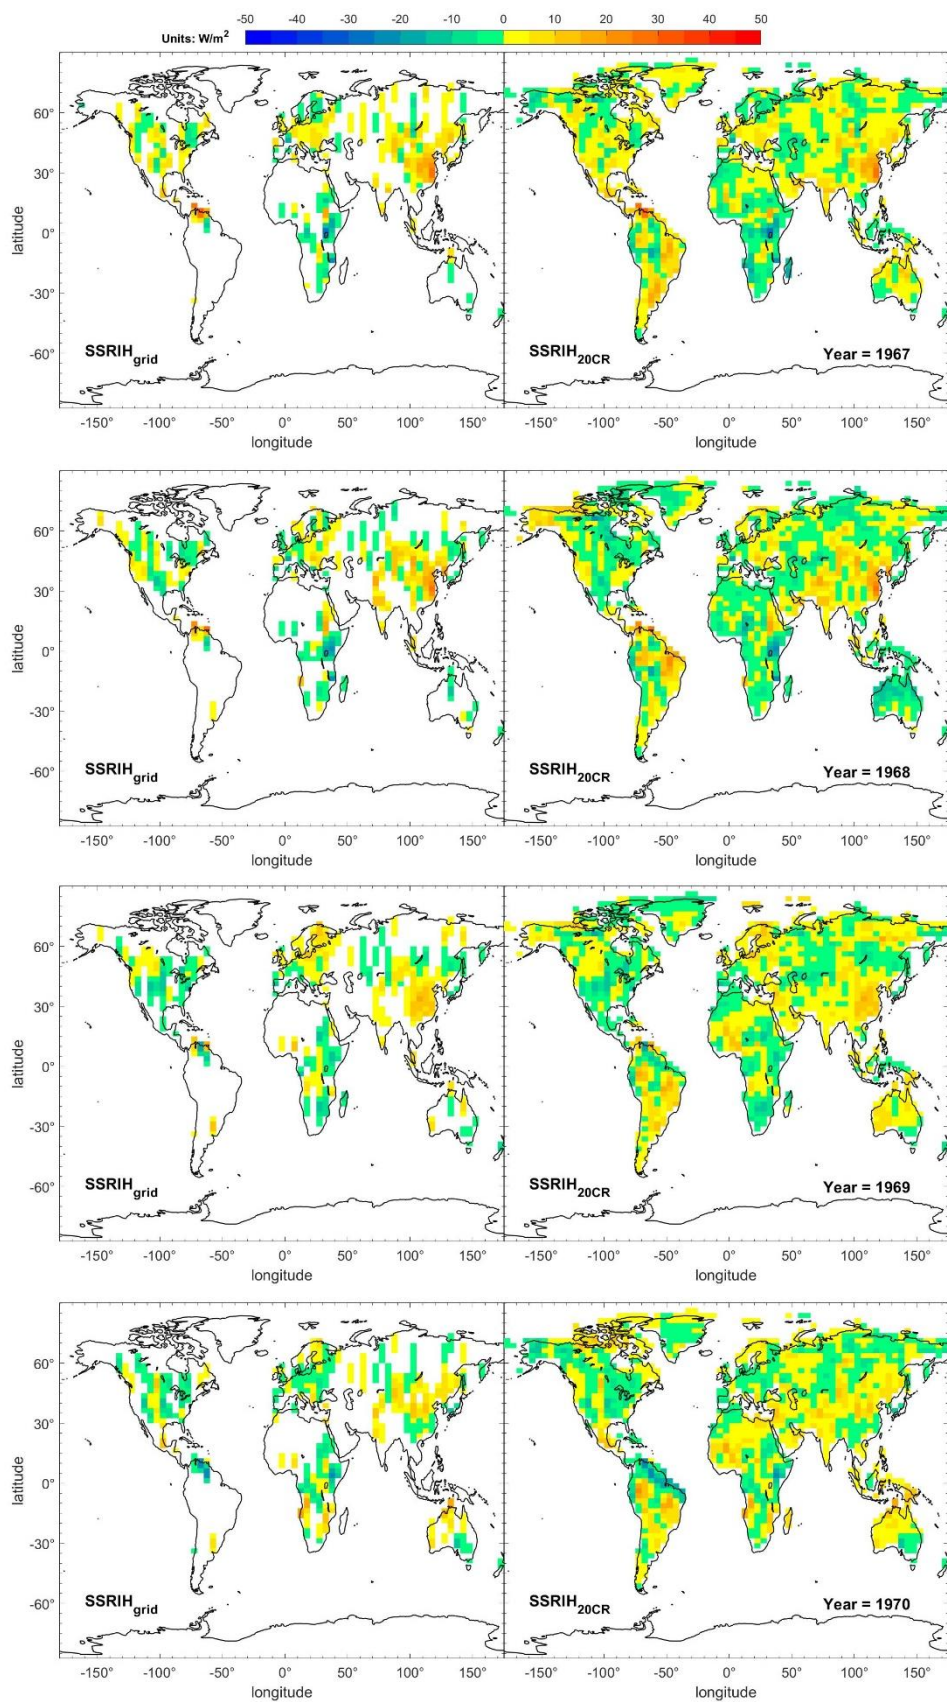

**Figure S6-4: Spatial distribution of SSRIH<sub>grid</sub> (column 1) and SSRIH<sub>20CR</sub> (column 2) in typical years (1967-1970).**

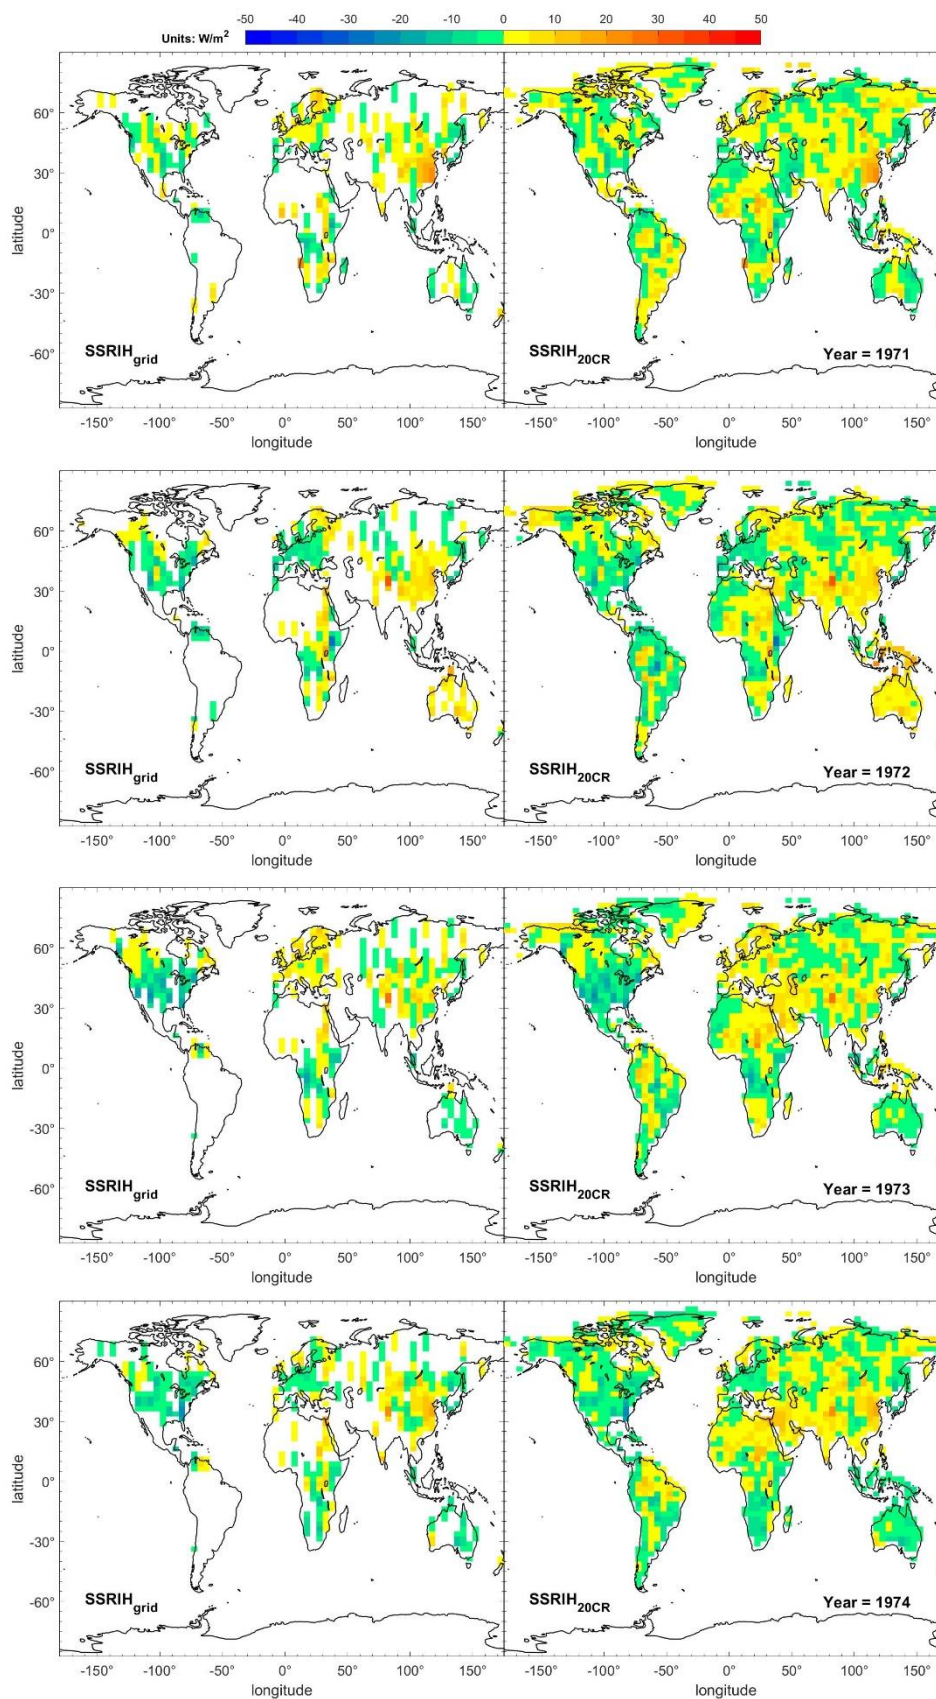

Figure S6-5: Spatial distribution of  $SSRIH_{grid}$  (column 1) and  $SSRIH_{20CR}$  (column 2) in typical years (1971-1974).

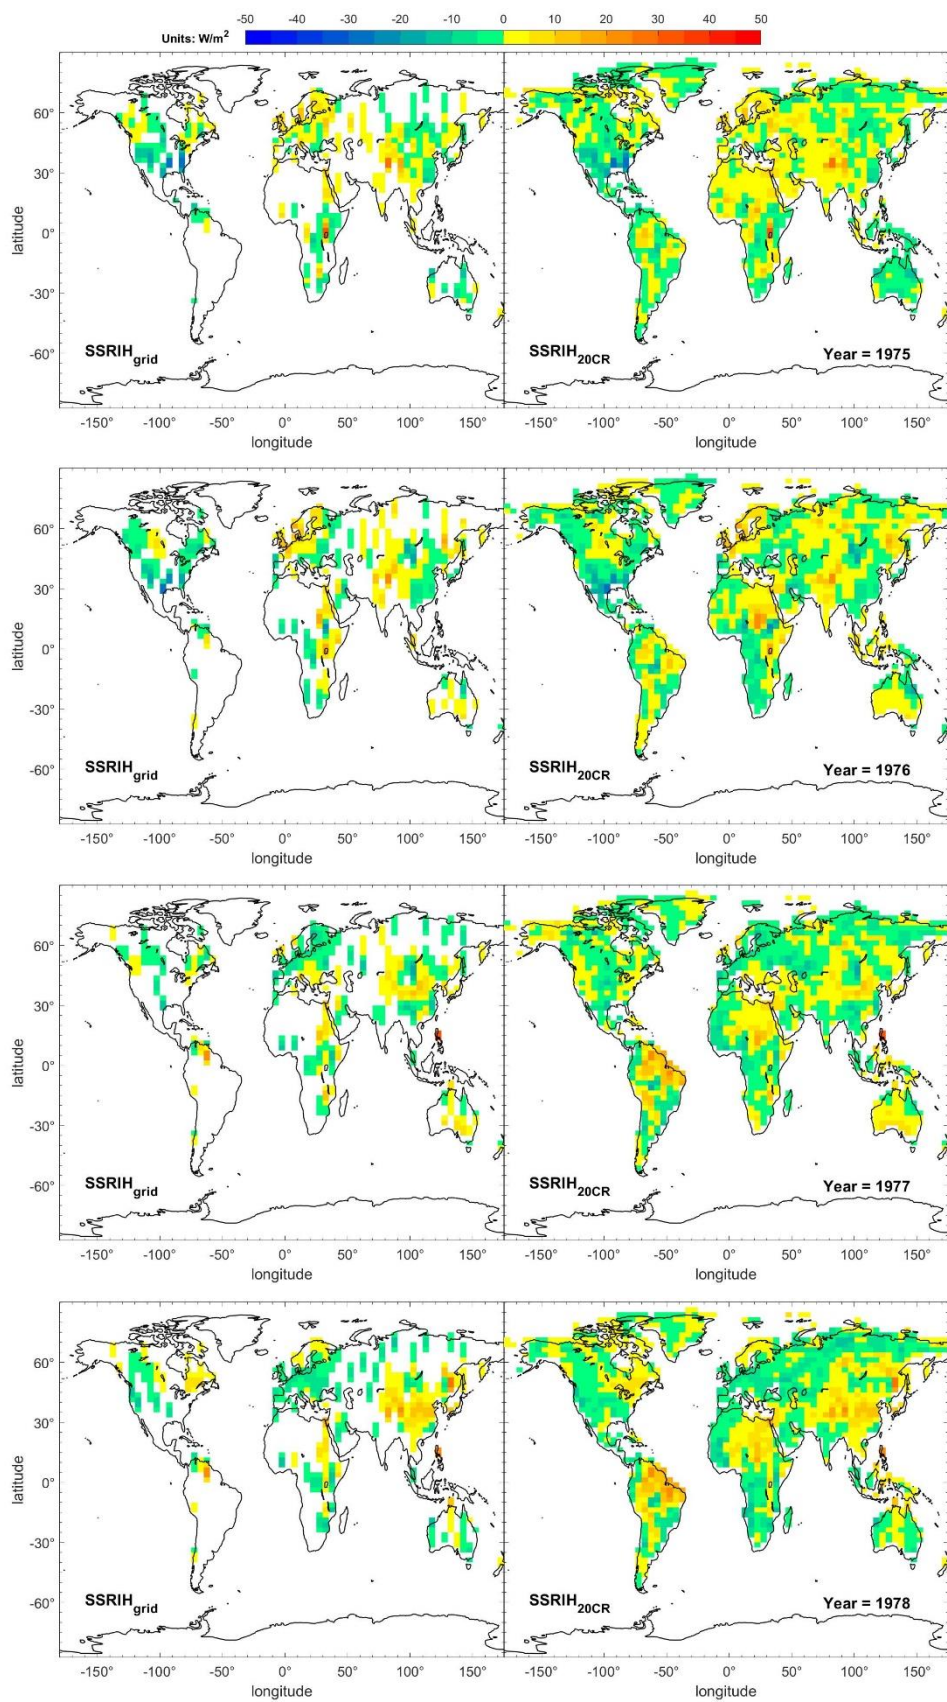

**Figure S6-6: Spatial distribution of SSRIH<sub>grid</sub> (column 1) and SSRIH<sub>20CR</sub> (column 2) in typical years (1975-1978).**

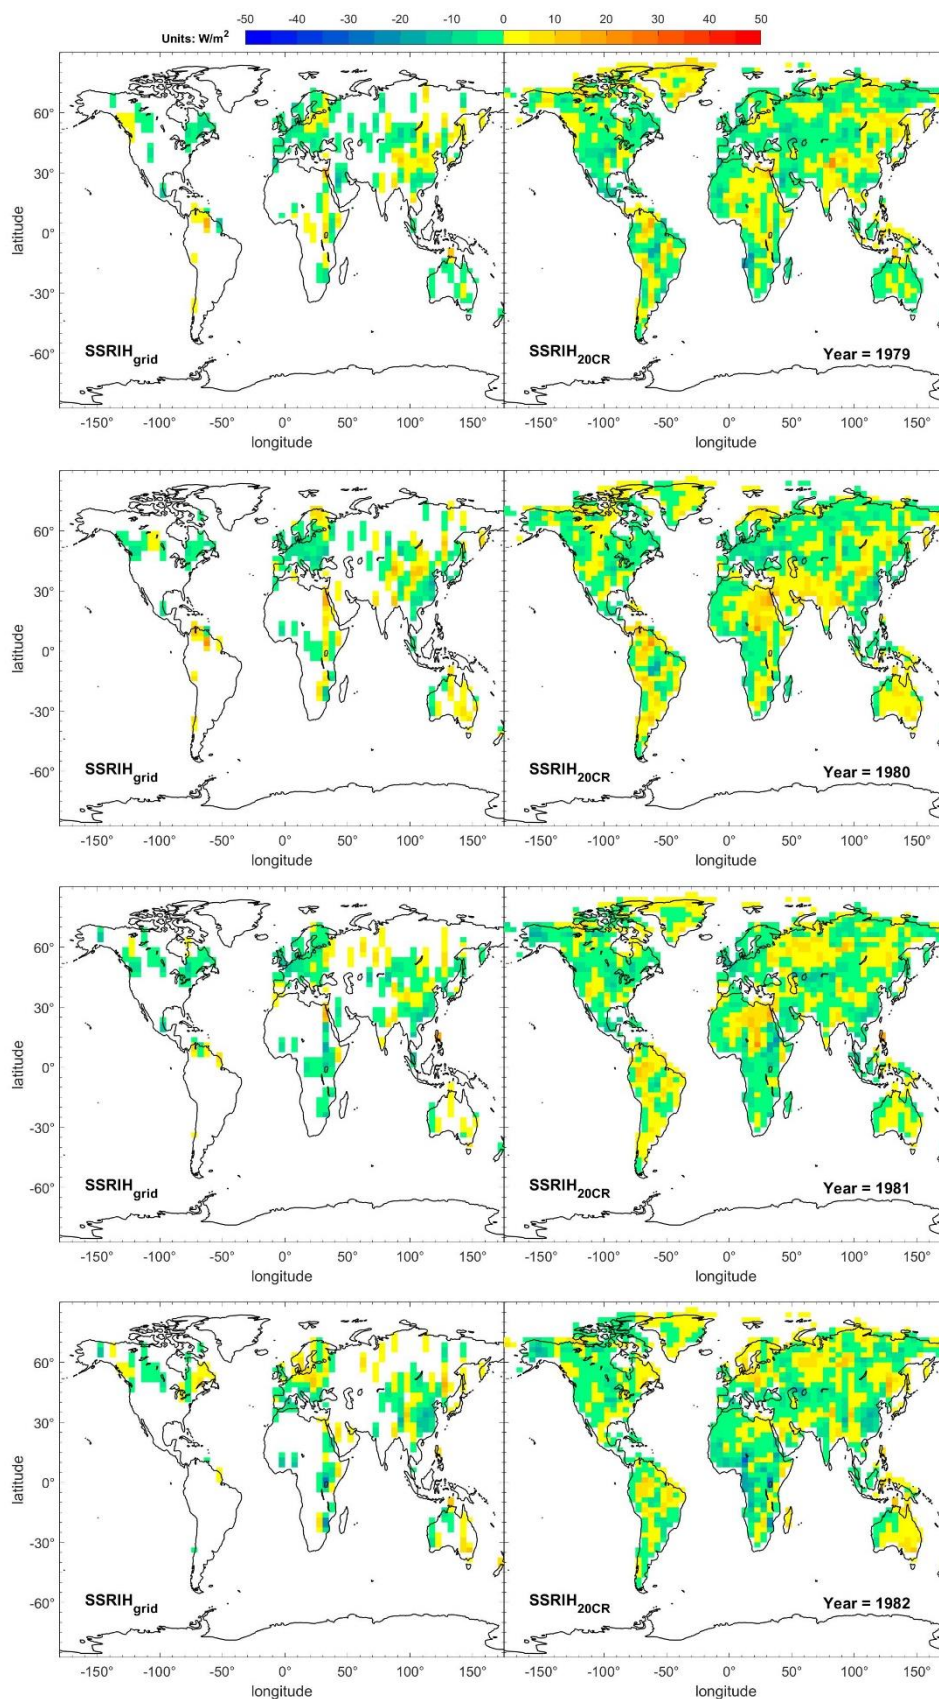

Figure S6-7: Spatial distribution of SSRIH<sub>grid</sub> (column 1) and SSRIH<sub>20CR</sub> (column 2) in typical years (1979-1982).

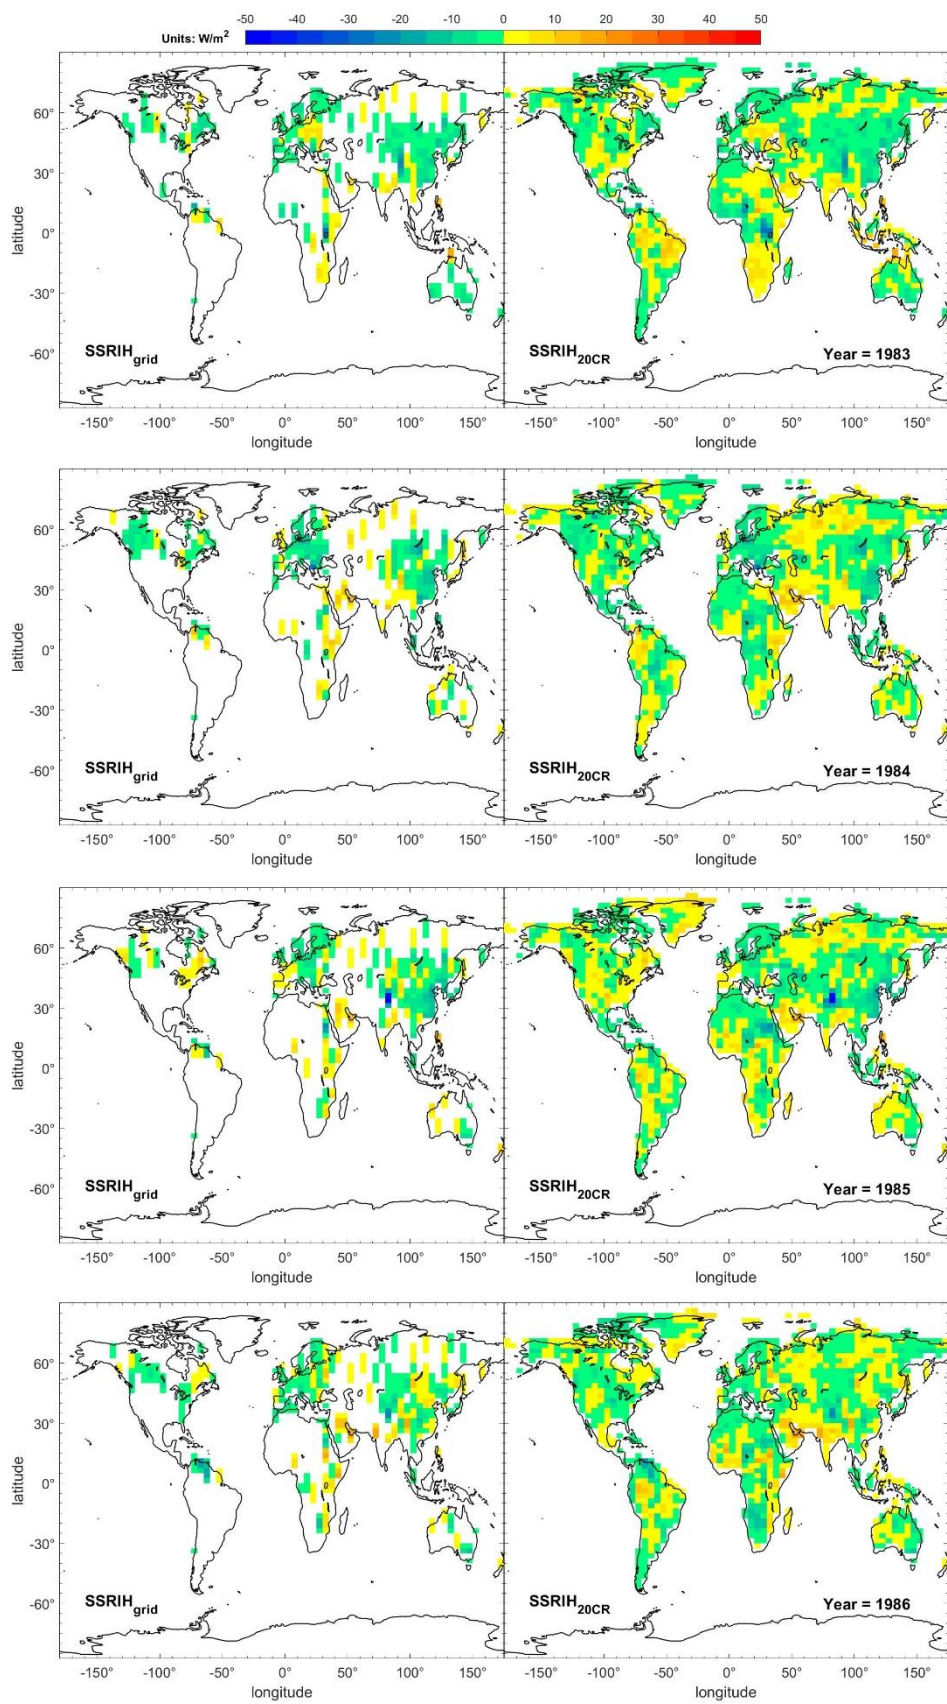

165

**Figure S6-8: Spatial distribution of SSRIH<sub>grid</sub> (column 1) and SSRIH<sub>20CR</sub> (column 2) in typical years (1983-1986).**

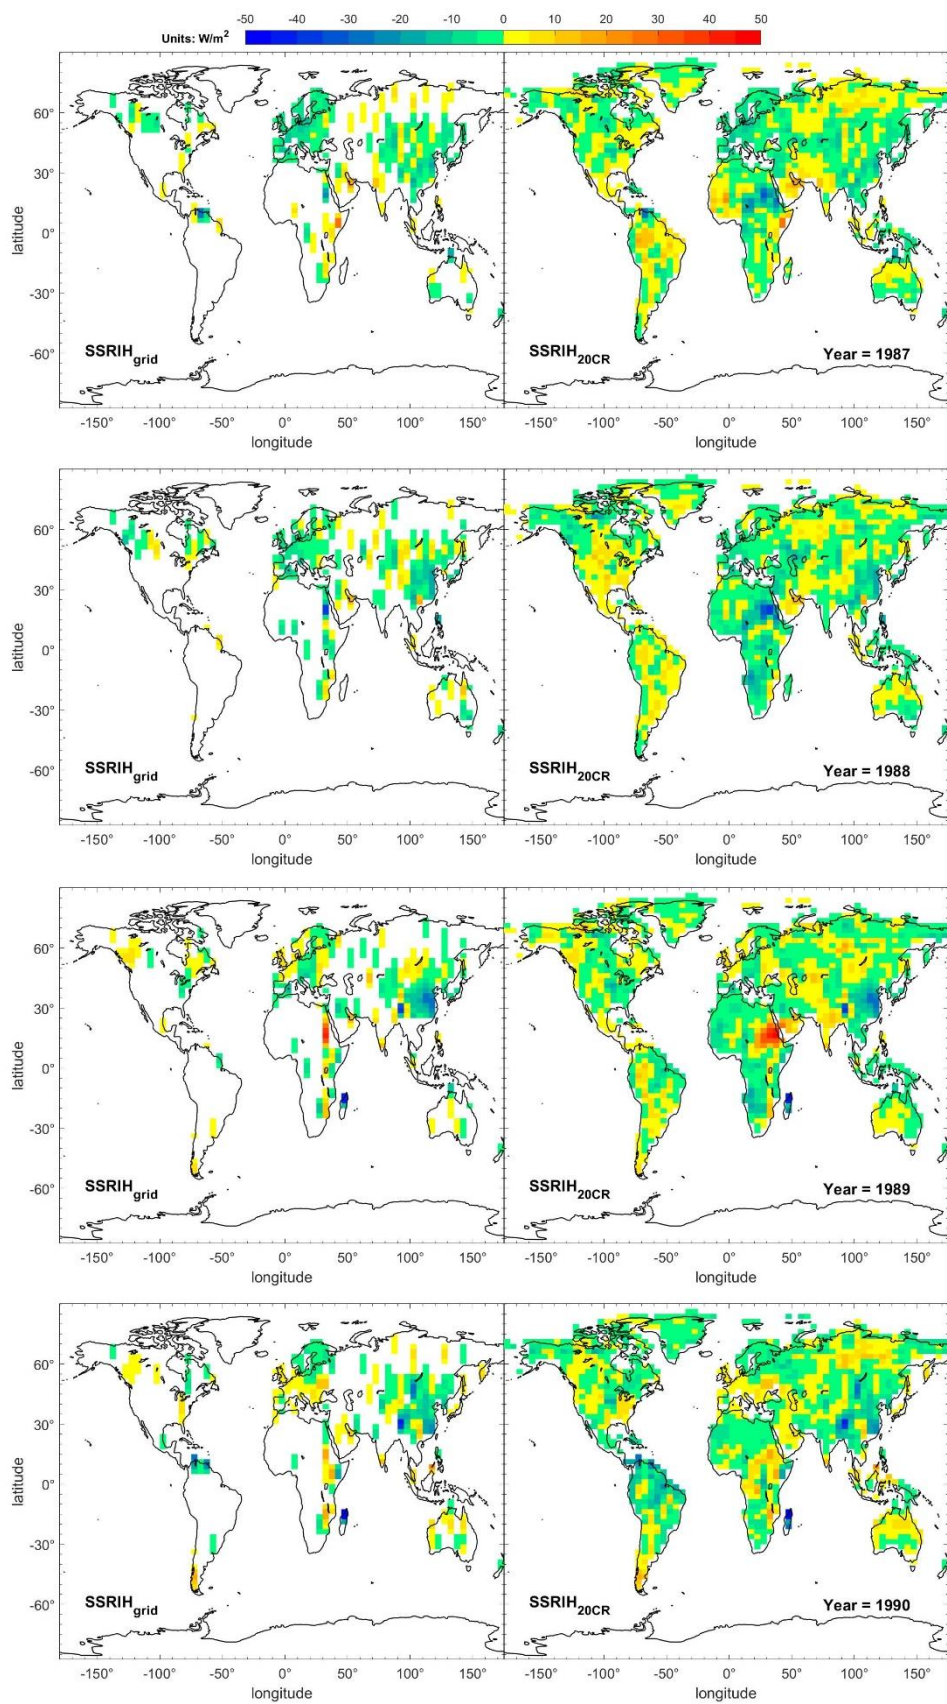

**Figure S6-9: Spatial distribution of SSRIH<sub>grid</sub> (column 1) and SSRIH<sub>20CR</sub> (column 2) in typical years (1987-1990).**

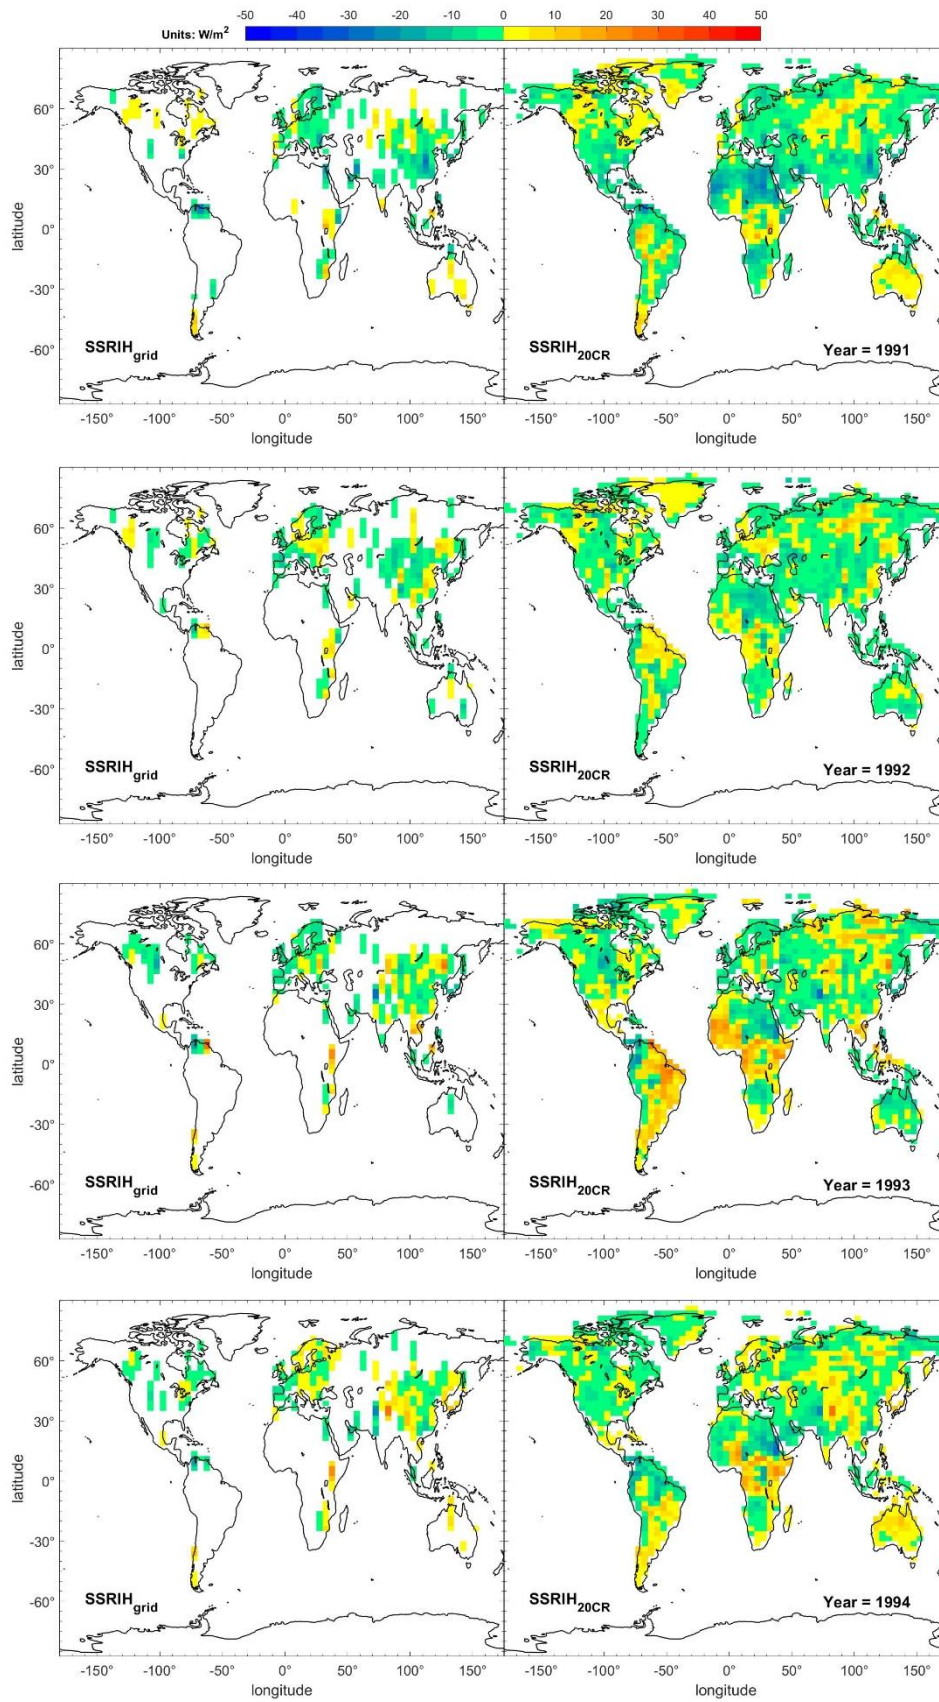

180 **Figure S6-10: Spatial distribution of SSRIH<sub>grid</sub> (column 1) and SSRIH<sub>20CR</sub> (column 2) in typical years (1991-1994).**

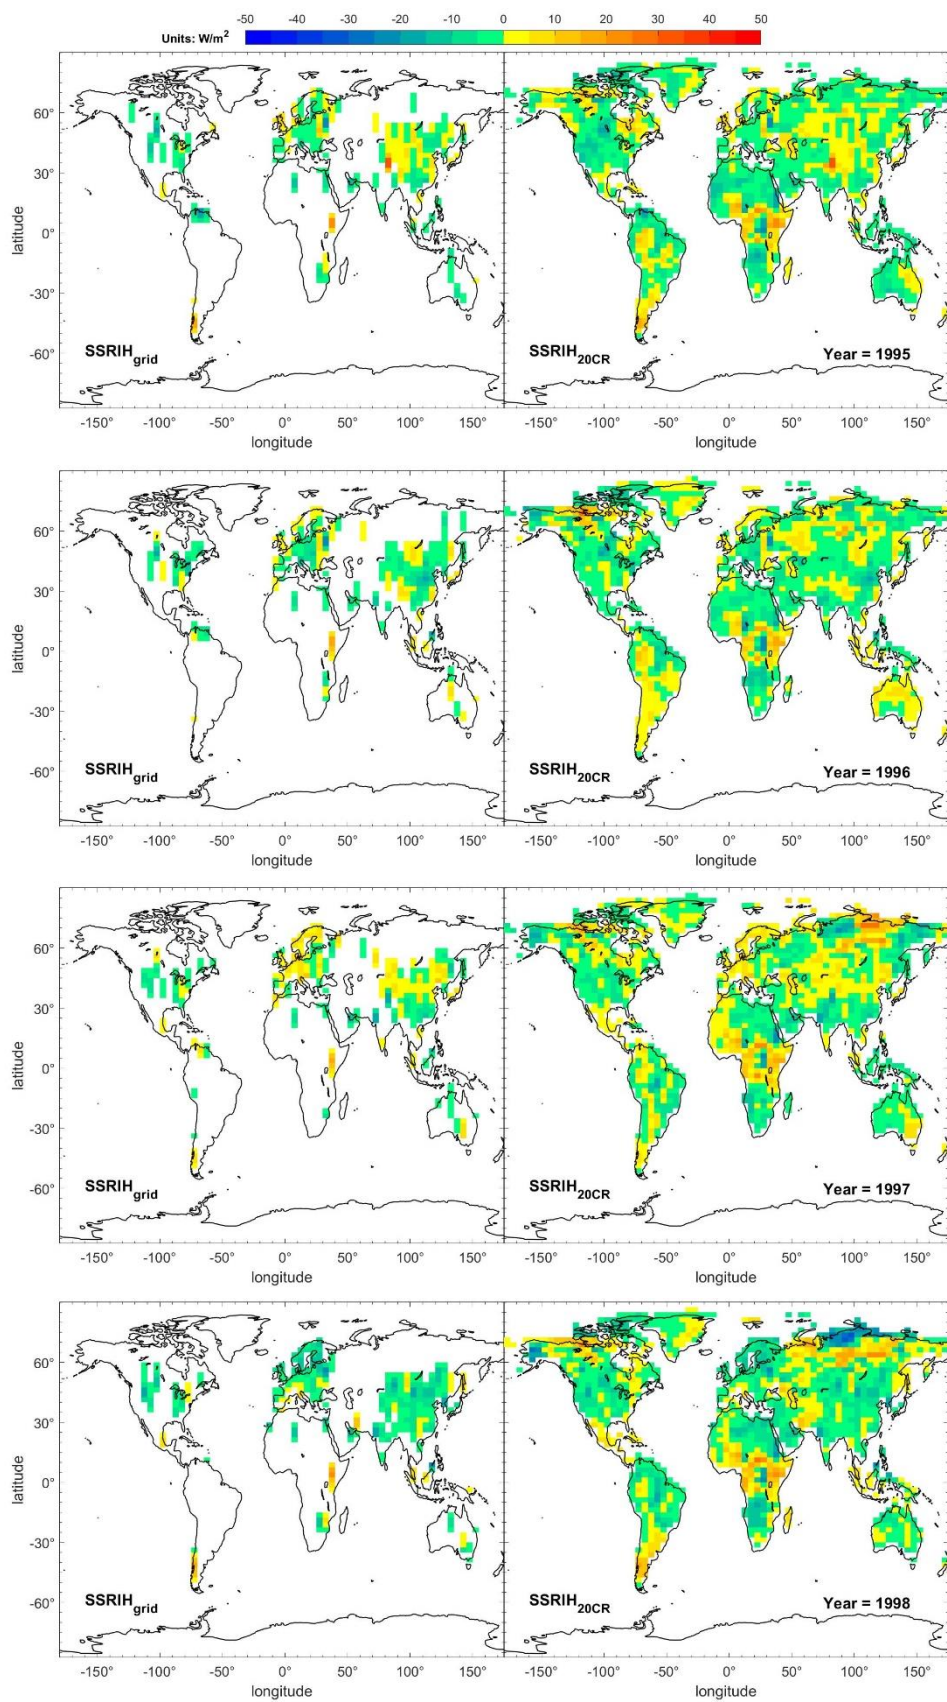

Figure S6-11: Spatial distribution of SSRIH<sub>grid</sub> (column 1) and SSRIH<sub>20CR</sub> (column 2) in typical years (1995-1998).

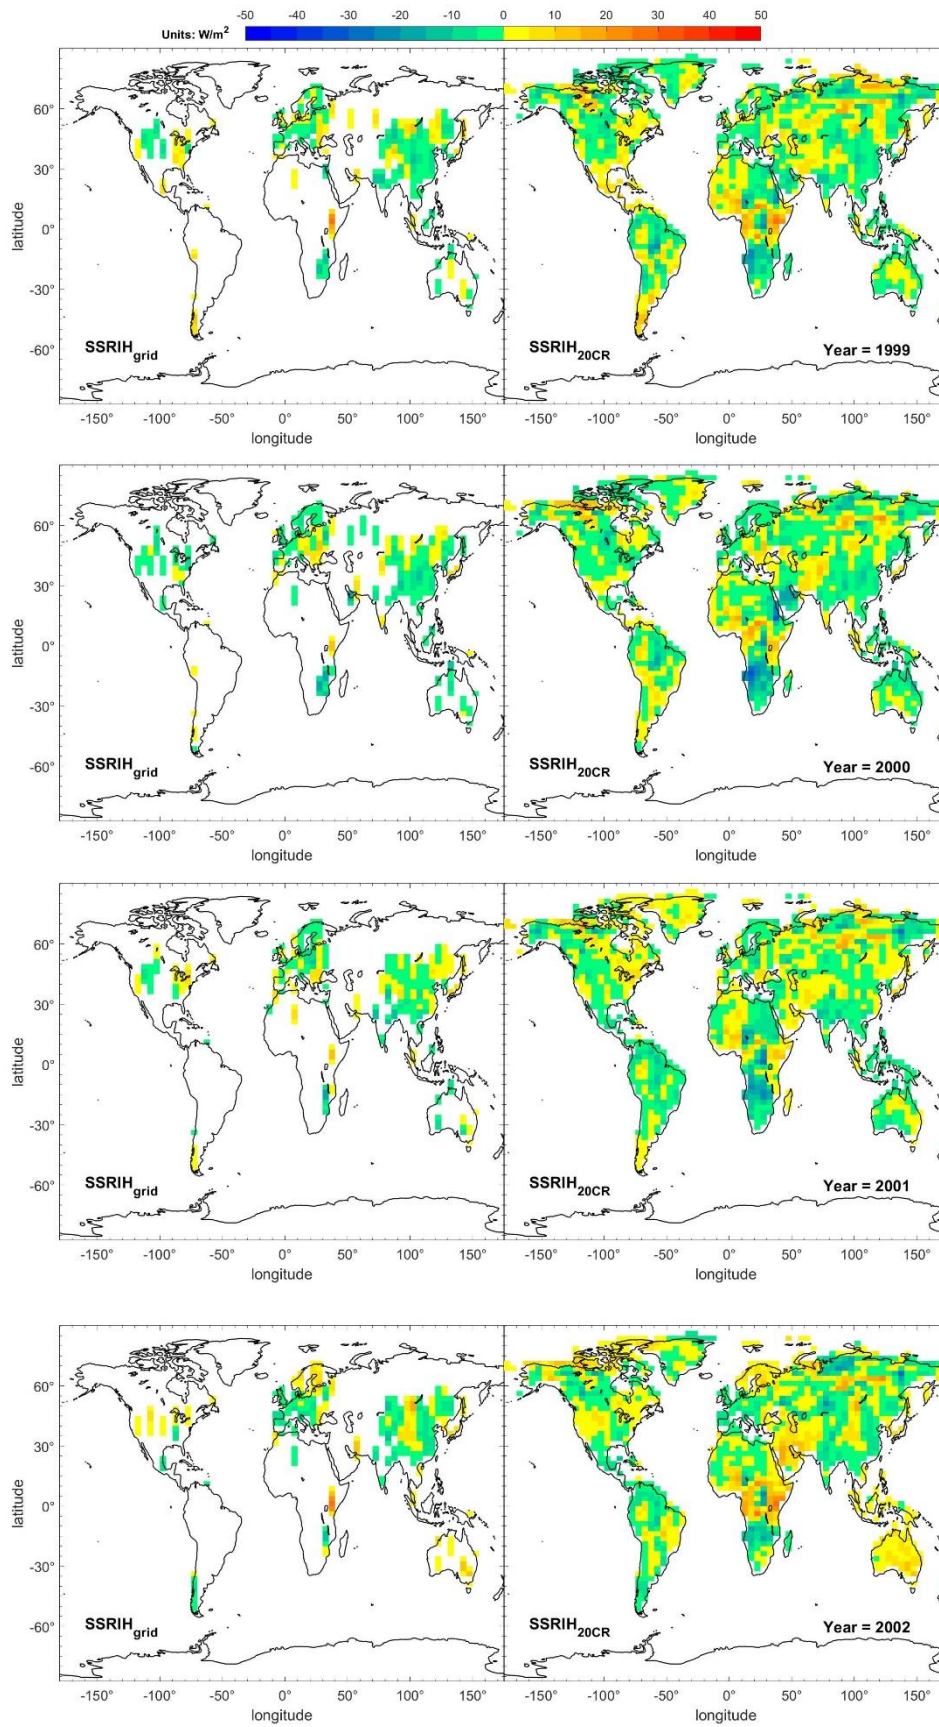

Figure S6-12: Spatial distribution of SSRIH<sub>grid</sub> (column 1) and SSRIH<sub>20CR</sub> (column 2) in typical years (1999-2002).

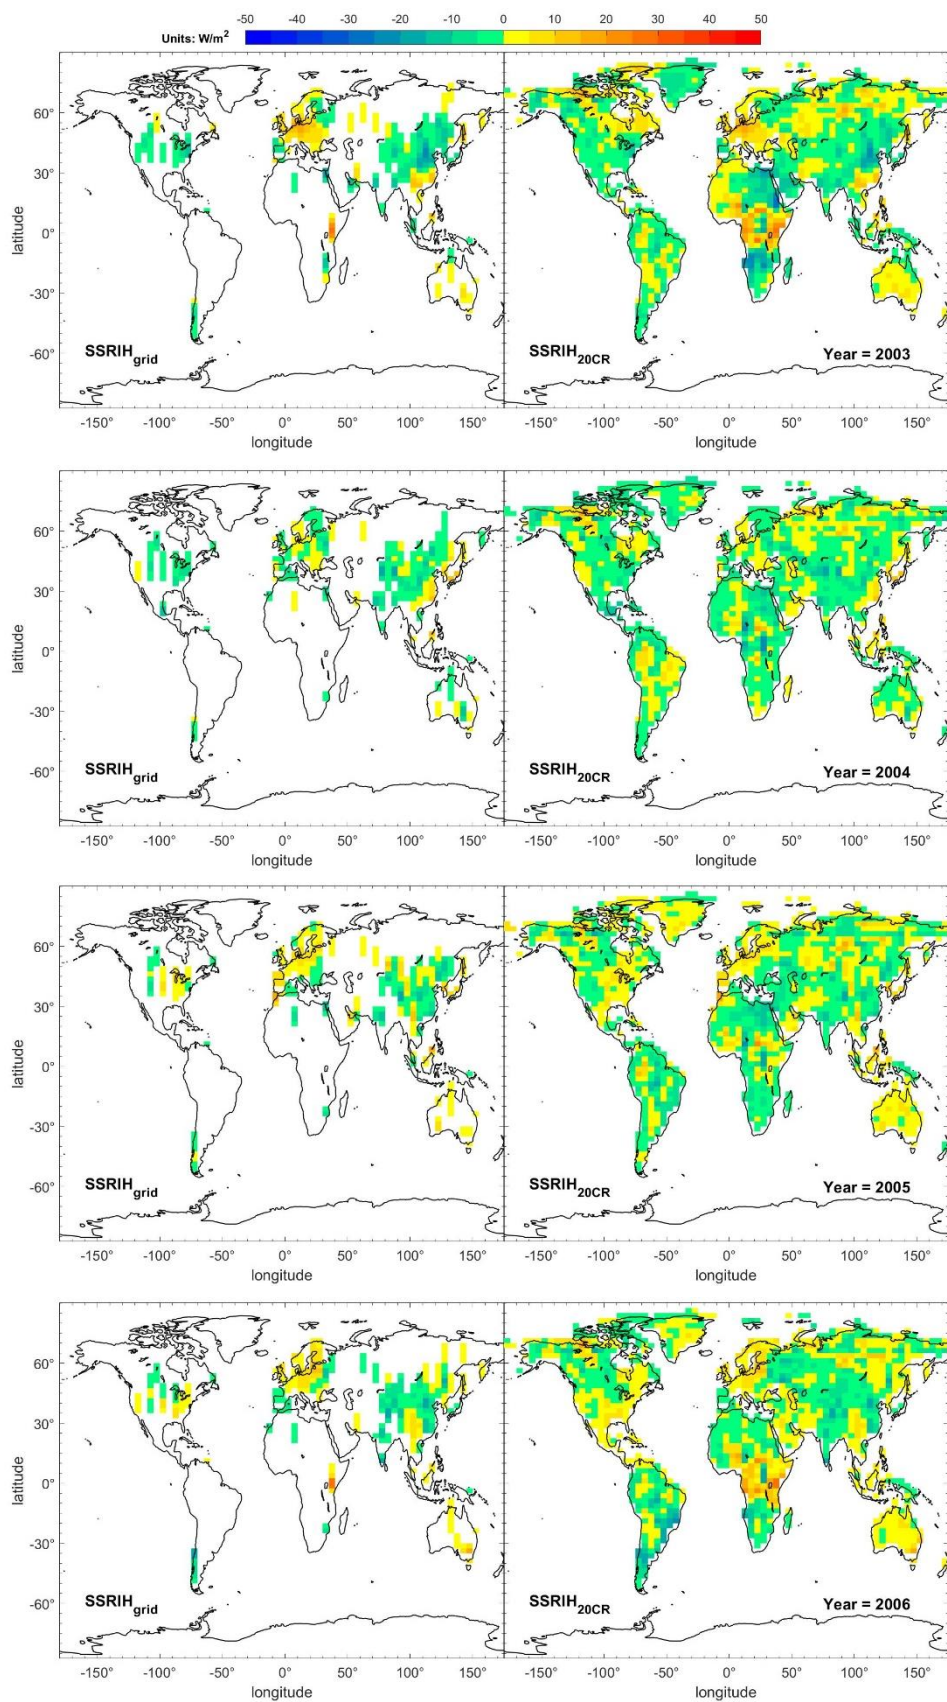

200 **Figure S6-13: Spatial distribution of SSRIH<sub>grid</sub> (column 1) and SSRIH<sub>20CR</sub> (column 2) in typical years (2003-2006).**

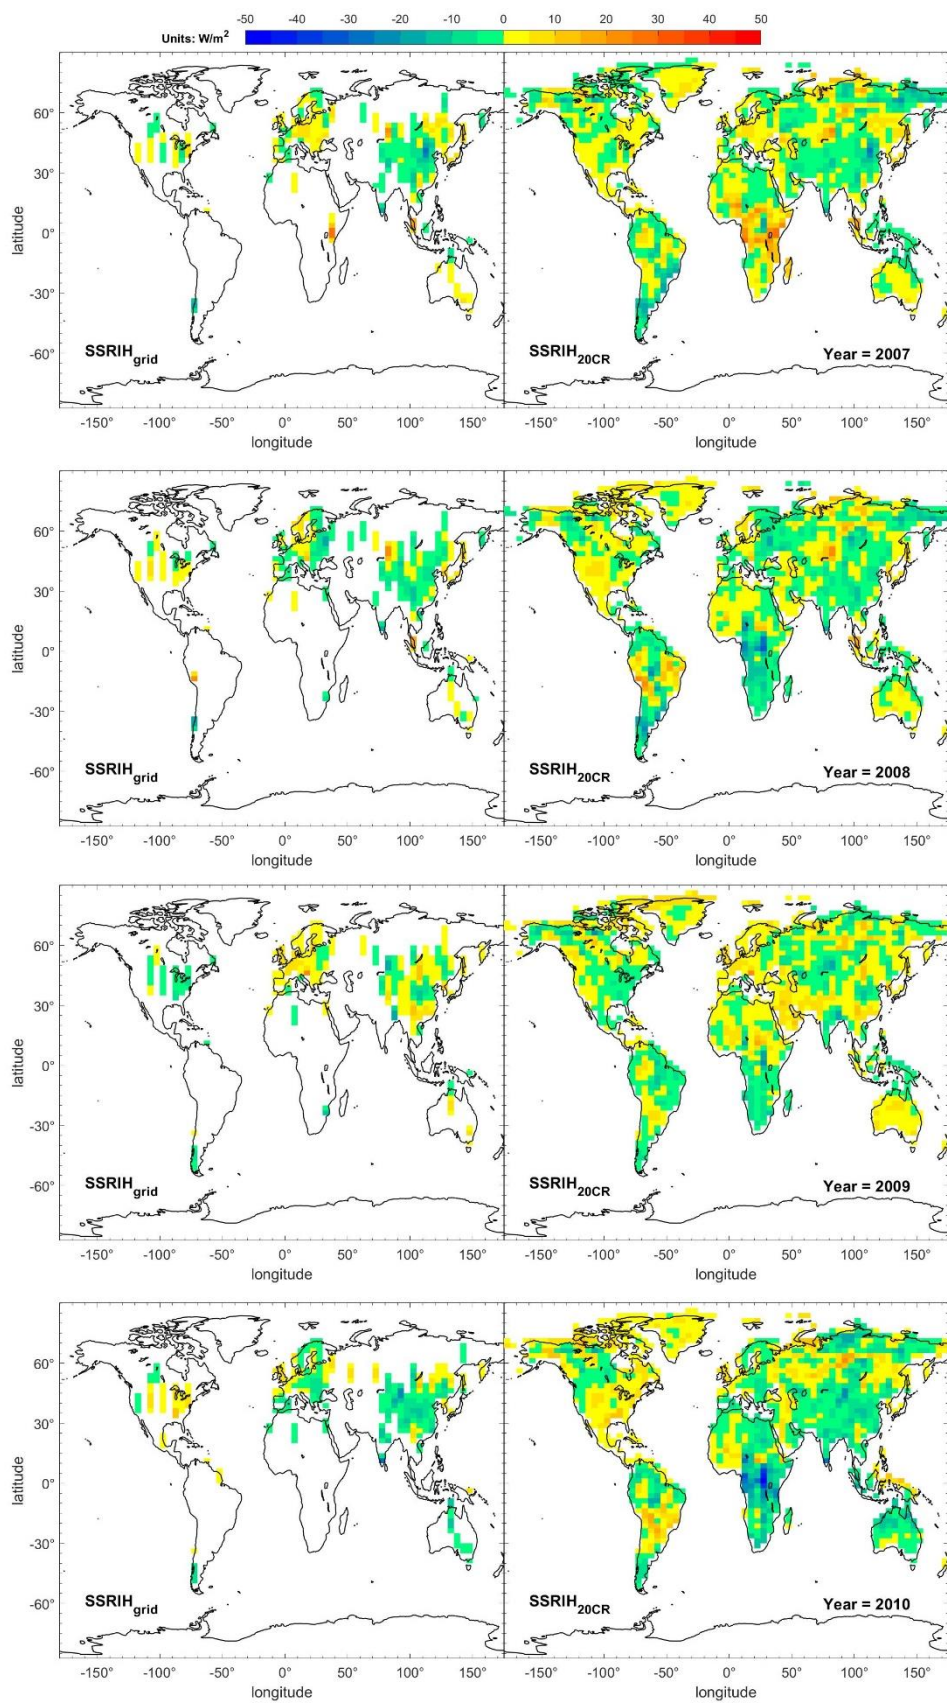

Figure S6-14: Spatial distribution of SSRIH<sub>grid</sub> (column 1) and SSRIH<sub>20CR</sub> (column 2) in typical years (2007-2010).

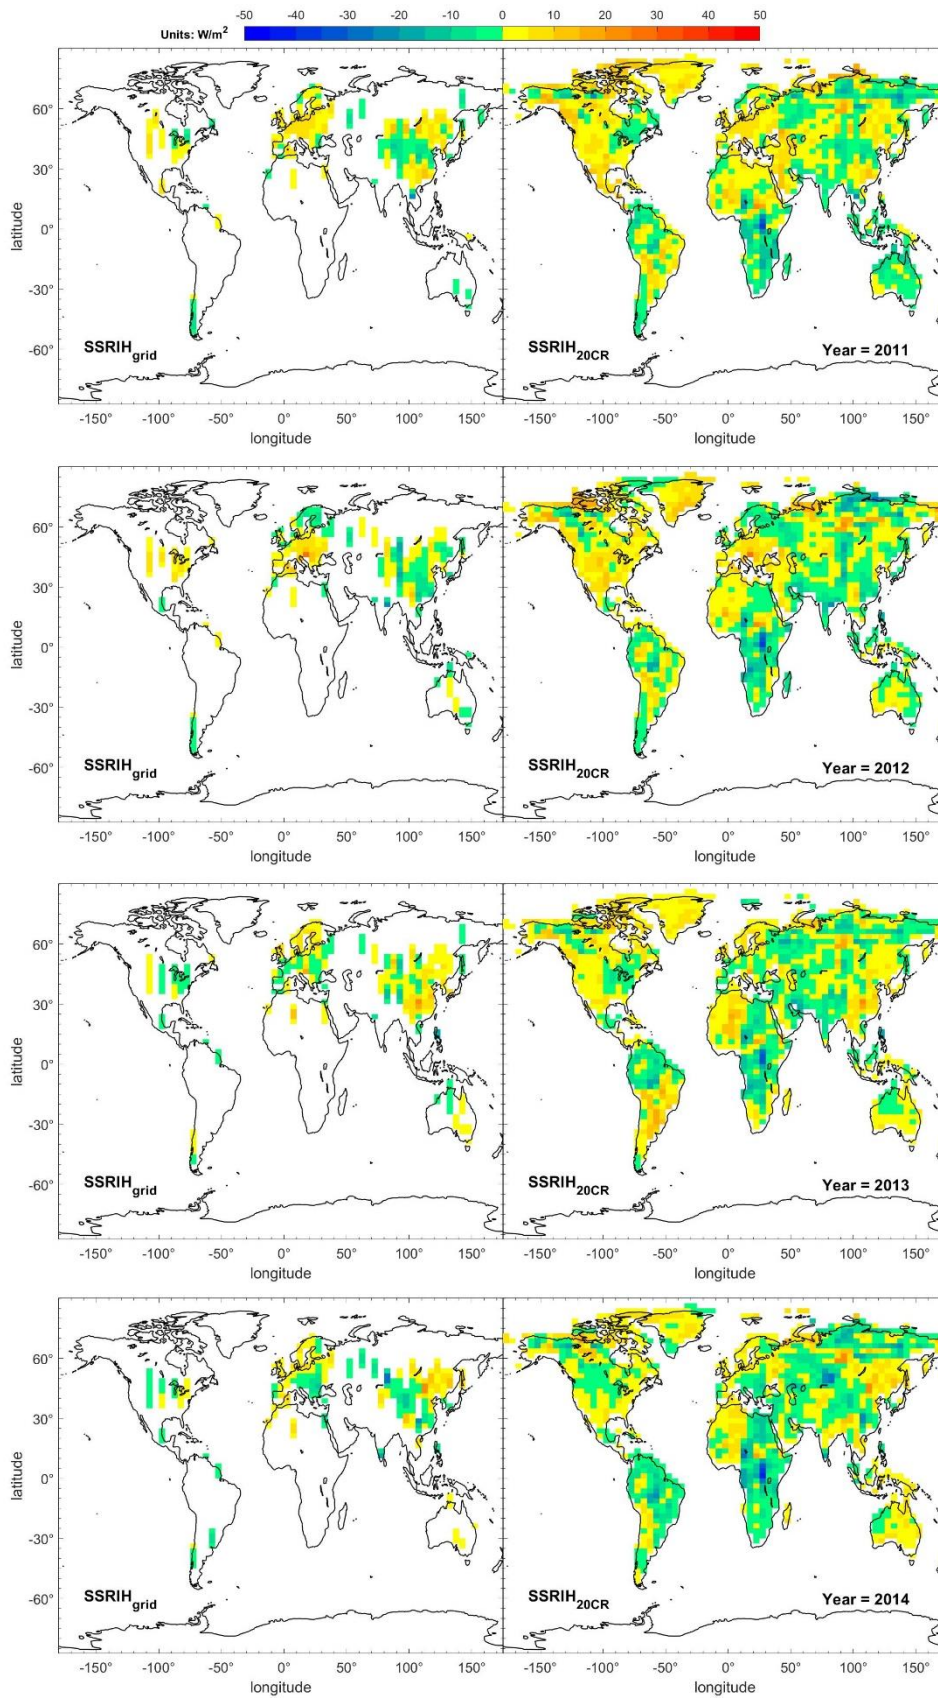

Figure S6-15: Spatial distribution of SSRIH<sub>grid</sub> (column 1) and SSRIH<sub>20CR</sub> (column 2) in typical years (2011-2014).

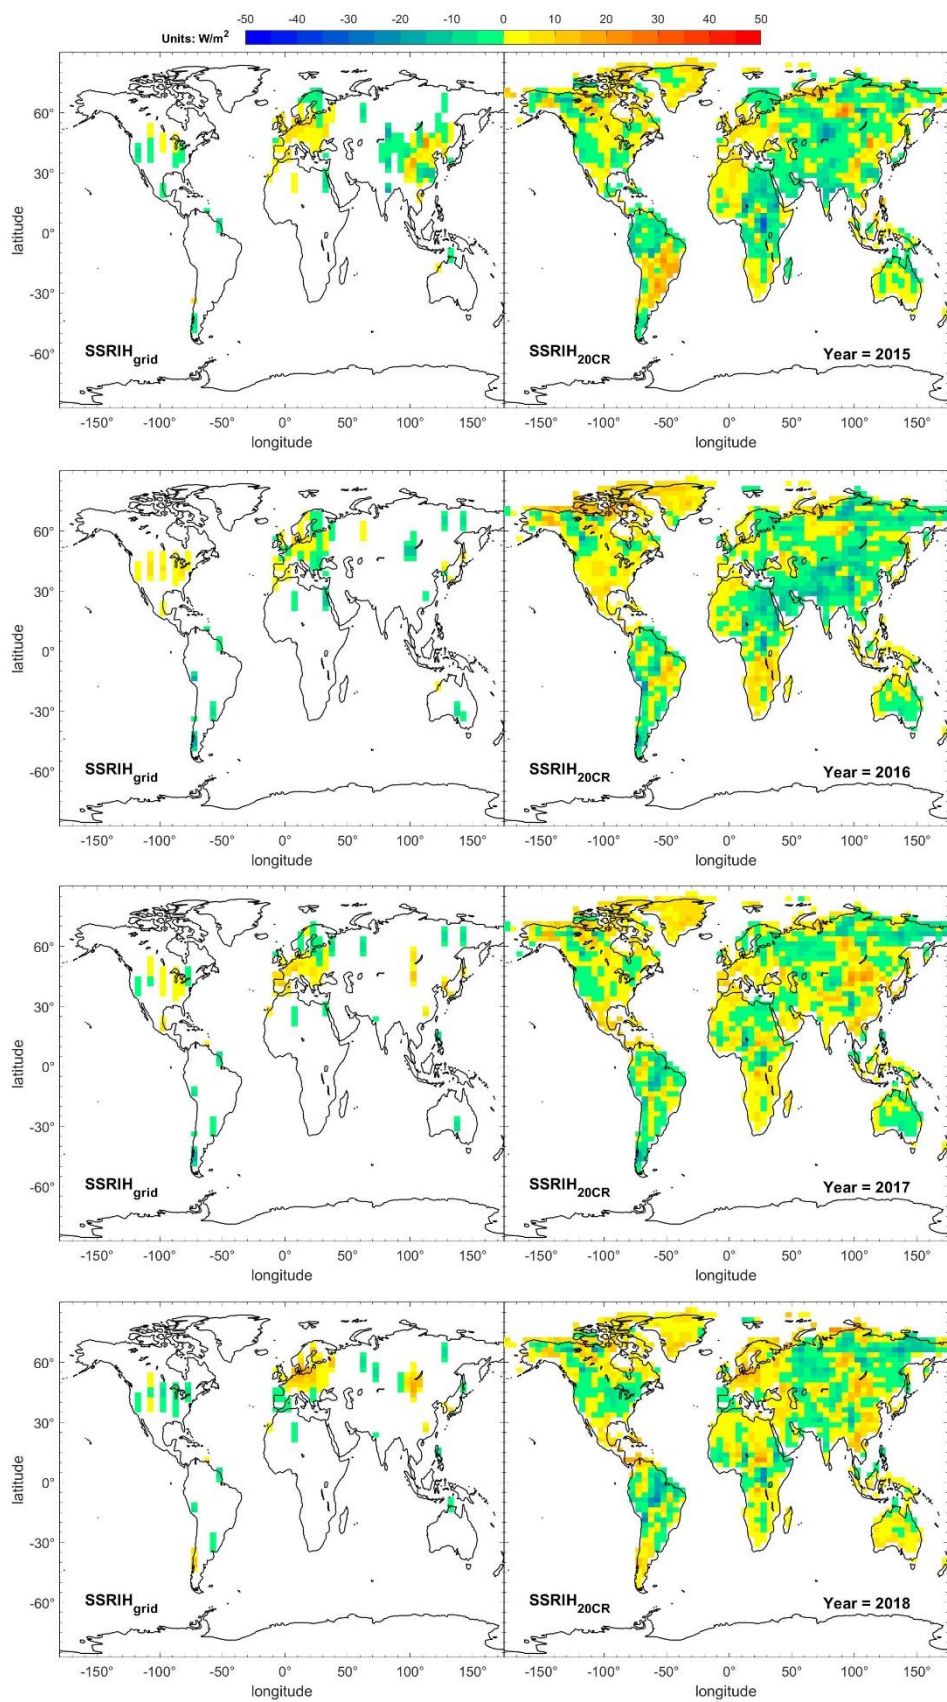

Figure S6-16: Spatial distribution of SSRIH<sub>grid</sub> (column 1) and SSRIH<sub>20CR</sub> (column 2) in typical years (2015-2018).

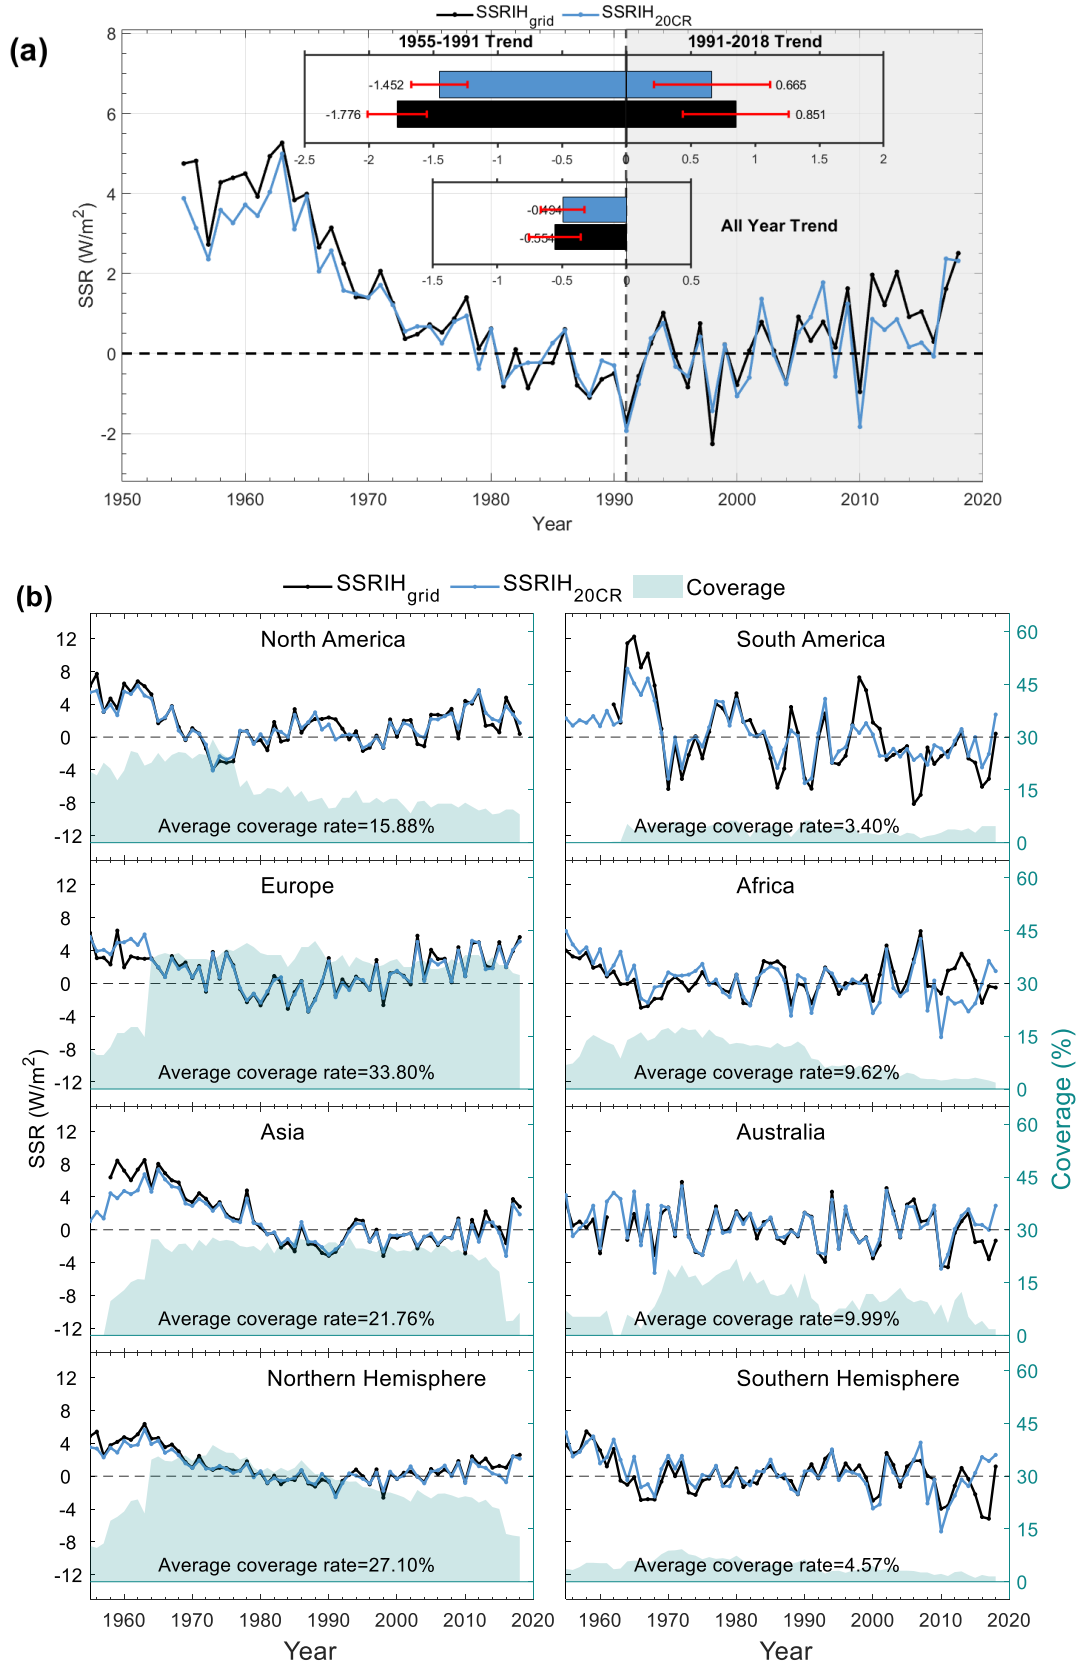

**Figure S7: Global and regional (except for Antarctica) land annual SSR anomaly variations (relative to 1971-2000) before/after reconstruction. The Black solid line represents the  $\text{SSRIH}_{\text{grid}}$  annual anomalies. The solid blue line represents the reduced  $\text{SSRIH}_{20\text{CR}}$  annual anomalies. The histograms represent the decadal**

230 trends of the  $SSRIH_{grid} / SSRIH_{20CR}$  (unit: W/m<sup>2</sup> per decade) and their 95% uncertainty range from 1955 to 1991, 1991-2018 and 1955-2018, and the  $SSRIH_{20CR}$  is reduced to the grid boxes with in situ observations.

## Reference

Liu, G., Reda, F. A., Shih, K. J., Wang, T.-C., Tao, A., and Catanzaro, B.: Image Inpainting for Irregular Holes Using Partial Convolutions, Cham, 89-105, doi: [org/10.1007/978-3-030-01252-6\\_6](https://doi.org/10.1007/978-3-030-01252-6_6), 2018.

235
