# Supplementary material for: An integrated and homogenized global surface solar radiation dataset and its reconstruction based on an artificial intelligence approach
Source: Copernicus journal article supplement (doi:10.5194/essd-2023-178), 2023-05-22
Supplement: Supplementary file 1 [file essd-2023-178-supplement.zip › Table S2 Station_Information.xlsx]

## Sheet: Sheet1
	Station_list	Latitude	Longitude	Elevation	Start_year	End_year	Reference	Adjusted
1	South Pole	-90	24.8	2800	1992	2004
2	Vostok	-78.5	106.8	3488	1965	1988
3	Concordia Station	-75.1	123.4	3233	2006	2020
4	Novolazarevskaya	-70.8	11.8	87	1964	1988
5	Georg von Neumayer	-70.7	-8.3	42	1992	2014
6	Syowa	-69	39.6	18	2009	2020
7	Dumont d'Urville	-66.7	140	43	1974	1986
8	Mirny	-66.6	93	40	1964	1993
9	Macguarie Is.	-54.5	159	6	1969	1992
10	Punta Arenas	-53.1	-71	37	1989	2012
11	Port-aux-Francais	-49.3	70.2	18	1975	1986
12	Marion Island	-46.9	37.9	22	1955	1975
13	Invercargill	-46.4	168.3	2	1966	1990
14	Coyhaique	-45.6	-72.1	310	1990	2017
15	Lauder	-45.1	169.7	350	2000	2018
16	Mount John	-44	170.5	1026	1967	1987
17	Christchurch Airp.	-43.5	172.5	34	1966	1990
18	Hobart Airport	-42.8	147.5	4	1968	1991
19	Puerto Montt	-41.4	-73.1	85	1998	2018
20	Wellington / Kelburn	-41.3	174.8	126	1965	1990
21	Cape Grim	-40.7	144.7	94	1991	2018
22	Ohakea	-40.2	175.4	55	1965	1990
23	Aspendale	-38	145.1	6	1967	1981
24	Laverton	-37.9	144.7	16	1968	1991
25	Melbourne	-37.8	145	38	1951	1985
26	Mt. Gambier Airpt.	-37.7	140.8	65	1969	2005
27	Melbourne Airport	-37.7	144.8	132	2000	2016
28	Auckland Airport	-37	174.8	6	1970	1987
29	Concepcion	-36.8	-73.1	13	1971	2008
30	Wagga Wagga AMO	-35.2	147.5	221	1969	2013
31	Albany Airp.	-35	117.8	71	1969	1984
32	Adelaide Airport	-35	138.5	49	1983	2017
33	Buenos Aires	-34.6	-58.5	25	1964	2018
34	Mildura Airp.	-34.2	142.1	51	1970	2004
35	Cape Town	-34	18.6	44	1952	1975
36	Port Elizabeth	-34	25.6	62	1958	1975
37	Santiago (Chile)	-33.5	-70.7	520	1972	2018
38	Pudahuel	-33.4	-70.8	474	1988	2004
39	El 0livar	-33	-71.5	120	1962	2004
40	Williamtown	-32.8	151.8	4-9	1953	1981
41	Perth	-31.9	115.9	19	1954	1992
42	Woomera	-31.1	136.8	165	1970	1985
43	Kalgoorlie Airp.	-30.8	121.5	360	1980	2005
44	Forrest Airp.	-30.8	128.1	156	1970	1986
45	El Tololo	-30.2	-70.7	2154	2005	2017
46	Durban	-30	31	8	1952	1976
47	Bloemfontein	-29.1	26.3	1351	1954	1976
48	Geraldton Airp.	-28.8	114.7	37	1969	2005
49	Alexander Bay	-28.6	16.5	21	1953	1976
50	Keetmanshoop	-26.6	18.1	1064	1957	1975
51	Umbeluzi	-26.1	32.4	12	1973	1993
52	Maputo	-26	32.6	70	1955	2009
53	Pretoria Irene	-25.9	28.2	1532	1952	1976
54	Pretoria	-25.8	28.2	1369	1952	1973
55	Pretoria Forum	-25.7	28.2	1331	1966	1976
56	Roodeplaat	-25.6	28.4	1164	1957	1976
57	Maniquenique	-24.7	33.5	13	1971	1991
58	Chokwe	-24.5	33	33	1965	1998
59	Pietersburg	-23.9	29.5	1230	1953	1968
60	Inhambane	-23.9	35.4	14	1965	1985
61	Alice Springs	-23.8	133.9	545	1953	2013
62	Longreach Airp.	-23.4	144.3	191	1969	2013
63	Rockhampton Airp.	-23.4	150.5	10	1974	2014
64	Windhoek	-22.6	17.1	1728	1952	1976
65	Learmonth Airport	-22.2	114.1	6	1989	2014
66	Gillot / Saint Denis	-20.9	55.5	21	1975	2018
67	Koumac	-20.6	164.3	18	1982	2016
68	Port Hedland Airp.	-20.4	118.6	9	1970	1990
69	Bulawayo-Goetz-Obs.	-20.2	28.6	1344	1955	2000
70	Beira	-19.8	34.9	17	1958	1996
71	Chimoio	-19.1	33.5	731	1964	1990
72	Antananarivo	-18.9	47.5	1300	1954	1990
73	Arica	-18.3	-70.3	58	1971	2018
74	Halls Creek Airport	-18.2	127.7	410	1970	1990
75	Broome Airport	-18	122.2	17	1997	2016
76	Harare / Belvedere	-17.8	31	1472	1968	2003
77	Nandi	-17.8	177.5	16	1966	2007
78	Mocuba	-16.8	37	134	1970	1982
79	Willis Is.	-16.3	150	6	1978	1992
80	Tete	-16.2	33.6	154	1966	1996
81	Mocamedes	-15.2	12.2	44	1958	1971
82	Nampula	-15.1	39.3	441	1965	2001
83	Lumbo	-15	40.7	15	1958	1985
84	Pemba	-13	40.5	50	1974	1994
85	Darwin	-12.4	130.9	30	1953	2018
86	Luso	-11.8	19.9	1328	1958	1973
87	Lubumbashi	-11.7	27.4	1260	1955	1975
88	Malange	-9.6	16.4	1139	1958	1973
89	De Belas	-8.9	13.2	53	1957	1986
90	Luanda	-8.8	13.2	44	1957	1986
91	Dili	-8.6	125.6	4	1964	1973
92	Dundo	-7.4	20.8	775	1958	1973
93	Kananga	-5.9	22.4	654	1959	1989
94	Kinshasa / Binza	-4.4	15.3	445	1954	1989
95	Mombasa Airport	-4	39.6	57	1964	1991
96	Voi	-3.4	38.6	560	1965	2007
97	Malindi	-3.2	40.1	20	1969	1986
98	Kindu	-3	25.9	515	1959	1982
99	Bukavu	-2.5	28.9	1635	1959	1980
100	Momote	-2.1	147.4	6	1998	2012
101	Nairobi	-1.3	36.8	1798	1957	1992
102	Narok	-1.1	35.8	1890	1965	1991
103	Mbarara	-0.6	30.7	1412	1964	1976
104	Garissa	-0.5	39.6	138	1967	1993
105	Nauru	-0.5	166.9	7	1999	2012
106	Nakuru	-0.3	36.1	1871	1967	1987
107	Boende	-0.2	20.9	375	1957	1981
108	Kisumu	-0.1	34.8	1157	1968	1993
109	Mbandaka	0.1	18.3	345	1956	1980
110	Entebbe	0.1	32.6	1155	1964	1976
111	Kasese	0.2	30.1	959	1965	1976
112	Sao Tome	0.4	6.7	8	1959	1973
113	Kisangani	0.5	25.2	415	1955	1977
114	Namulonge	0.5	32.6	1148	1960	1975
115	Jinja	0.5	33.2	1175	1967	1976
116	Eldoret	0.5	35.3	2120	1974	1992
117	Kitale	1	35	1890	1967	1991
118	Singapore Airport (neu Changi-Airpt.)	1.4	103.9	32	1965	2003
119	Kuching	1.5	110.3	27	1991	2008
120	Masindi	1.7	31.7	1146	1965	1975
121	Gulu	2.8	32.3	1104	1964	1975
122	Lodwar	3.1	35.6	506	1966	2007
123	Kuala Lumpur / Sub.	3.1	101.6	17	1975	2008
124	Mandera	3.9	41.9	230	1967	1992
125	Santa Elena de Uairen	4.6	-61.1	907	1964	1986
126	Cayenne-Rocheambeau	4.8	-52.4	5	1979	2018
127	Port Harcourt	4.8	7	15	1978	1989
128	Takoradi	4.9	-1.8	4	1965	1981
129	Juba	4.9	31.6	460	1958	1981
130	Puerto Ayacucho	5.6	-67.5	73	1965	1997
131	Accra	5.6	-0.2	68	1954	1978
132	Kota Kinabalu	5.9	116.1	3	1990	2006
133	Kota Bahru	6.2	102.3	5	1975	2008
134	Benin City	6.6	5.6	156	1967	1991
135	Kumasi	6.7	-1.6	283	1965	1988
136	Tumeremo	7.3	-61.5	180	1964	1997
137	San Antonio-del-Tachira	7.8	-72.4	377	1964	1995
138	S. ANTONIO DEL TACHIRA	7.9	-72.5	377	1964	1995
139	S. FERNANDO DE APURE	7.9	-67.4	47	1964	1996
140	CIUDAD BOLIVAR	8.2	-63.6	43	1964	1997
141	Trivandrum	8.5	77	60	1965	2014
142	Merida	8.6	-71.2	1479	1964	1996
143	Kwajalein	8.7	167.7	10	1993	2009
144	Malakal	9.6	31.7	390	1961	1981
145	Maturin	9.8	-63.2	65	1964	1995
146	Barquisimeto	10.1	-69.3	613	1964	1997
147	Barcelona (Venezuela)	10.1	-64.7	7	1964	1993
148	Maracay	10.3	-67.7	436	1964	1997
149	Marcaibo / La Chinita	10.5	-71.7	66	1964	1997
150	Caracas / La Carlotta	10.5	-66.9	835	1964	1992
151	Caracas / Maiquetia	10.6	-67	43	1964	1997
152	Piarco Intern. Airport	10.6	-61.4	12	1987	2018
153	Coro	11.4	-69.7	16	1964	1997
154	Ghazala Gawazat	11.5	26.5	481	1964	1979
155	Bissau	11.9	-15.6	20	1958	1972
156	Abu Naama	12.7	34.1	445	1959	1989
157	Madras	13	80.2	10	1958	2010
158	Santa Cruz	13.4	-88.8	30	1964	1974
159	El Fasher	13.6	25.3	733	1958	1984
160	Santa Tecla	13.7	-89.3	955	1964	1975
161	Bangkok	13.7	100.6	16	1966	2011
162	Wad Medani	14.4	33.5	408	1958	1990
163	Lamentin	14.6	-61	3	1975	2018
164	Quezon City/Manila / Science Garden	14.6	121	45	1977	2019		Yes
165	Dakar / Yoff	14.7	-17.5	27	1964	1990
166	Praia	14.9	-23.5	32	1958	1973
167	Goa / Panjim	15.5	73.8	55	1964	2012
168	Khartoum	15.6	32.6	380	1958	1989
169	Shambat Obs.	15.7	32.5	376	1964	1990
170	Raizet	16.3	-61.5	7	1978	2017
171	Xisha	16.8	112.3	5	1993	2015	[Yang et al. 2018]-Integeate-59981	Yes
172	Mindelo	16.9	-25	2	1957	1972
173	Hudeiba	17.6	33.9	350	1976	1990
174	Vishakhapatnam	17.7	83.2	41	1964	2015
175	Sanya	18.2	109.5	6	1992	2015	[Yang et al. 2018]-Integeate-59948	Yes
176	Poona	18.5	73.9	555	1958	2018
177	Ciudad Univ.	19.3	-99.2	2268	1967	2017
178	Wake Island	19.3	166.7	5	1954	1976
179	Port Sudan	19.6	37.2	3	1958	1982
180	Haikou	20	110.4	14	1958	2013
181	Nagpur / Sonegaon	21.1	79.1	308	1964	2010
182	Al Taif	21.5	40.6	1478	1975	1990
183	Beihai	21.5	109.1	153	1995	2015	[Yang et al. 2018]-Integeate-59644	Yes
184	Bhaunagar	21.8	72.2	5	1968	1990
185	Jinghong	21.9	100.8	533	1960	2013
186	Macau	22.2	113.6	57	1964	2017		Yes
187	Hong Kong	22.3	114.2	66	1969	2018
188	HeKou	22.5	103.9	1337	1958	1978	[Yang et al. 2018]-Integeate-56989	Yes
189	Zhongshan	22.5	113.4	1	1965	1990	[Yang et al. 2018]-Integeate-59485	Yes
190	Dum Dum / Calcutta	22.7	88.5	4	1964	2009
191	Tamanrasset	22.8	5.5	1377	1962	2020
192	Nanning	22.8	108.4	122	1961	2013
193	Ahmadabad	23.1	72.6	55	1964	2008
194	Guangzhou	23.1	113.3	11	1958	2015
195	Mengzi	23.3	103.4	1301	1961	2013
196	Shantou	23.4	116.7	4	1961	2013		Yes
197	Aswan	24	32.8	192	1980	2016
198	Al-Ain Int.Arpt	24.3	55.6	262	1995	2005
199	Ishigakijima	24.3	124.2	6	1965	2018		Yes
200	Minamitorishima	24.3	154	8	1970	2017
201	ABU DHABIINT.ARPT	24.4	54.7	27	1982	2005
202	Shaoguan	24.8	113.6	69	1961	1990		Yes
203	Miyakojima	24.8	125.3	40	1965	2007		Yes
204	Tengchong	25	98.5	1628	1958	2015	[Yang et al. 2018]-Integeate-56739	Yes
205	Kunming	25	102.7	1891	1959	2015	[Yang et al. 2018]-Integeate-56778	Yes
206	Dubai Int.Arpt	25.3	55.5	8	1989	2006
207	Guilin	25.3	110.3	167	1958	2015	[Yang et al. 2018]-Integeate-57957	Yes
208	El-Kharga	25.5	30.5	78	1972	2017
209	Al Hufuf	25.5	49.6	616	1976	1990
210	Miami	25.8	-80.3	8	1952	1975
211	Ganzhou	25.8	114.8	125	1958	2013
212	Minamidaitojima	25.8	131.2	15	1963	2007
213	Brownsville	25.9	-97.4	15	1951	1977
214	Unayzah	26.1	44	724	1976	1989
215	Fuzhou	26.1	119.3	88	1961	2013
216	Naha	26.2	127.7	35	1962	2017
217	Changning	26.4	112.4	117	1993	2015	[Yang et al. 2018]-Integeate-57874	Yes
219	Guiyang	26.6	106.7	1071	1960	2013
218	Panzhihua	26.6	101.7	1190	1992	2015	[Yang et al. 2018]-Integeate-56666	Yes
220	Lijiang	26.9	100.2	2393	1961	2013
221	Weining	26.9	104.3	2235	1962	1990
222	Jianou	27.1	118.3	155	1997	2015
223	Chichijima	27.1	142.2	4	1970	2018
224	Asyut	27.2	31.2	52	1982	2009
225	Zhaotong	27.3	103.8	1950	1961	1990
226	Zunyi	27.7	106.9	844	1961	1990
227	Maspalomas	27.8	-16	25	2004	2018
228	Las Palmas Airport	27.9	-15.2	24	2008	2018
229	Tampa	28	-82.5	3	1953	2000
230	Tenerife	28	-16.6	25	2006	2017
231	Changsha 1	28.2	112.9	68	1960	2013		Yes
232	Changsha 2	28.2	113.1	0	1961	1987
233	Izanza	28.3	-16.5	2400	2010	2020
234	Santa Cruz	28.3	-16.2	25	2007	2018
235	Jishou	28.3	109.7	207	1992	2015
236	Naze	28.4	129.5	3	1961	2014	[Ma et al. 2022]-Integeate-47909	Yes
237	Fuerteventura Airport	28.5	-13.9	29	2004	2018
238	Nanchang	28.6	115.9	207	1960	2013		Yes
239	Hongjia	28.6	121.4	1	1992	2015	[Yang et al. 2018]-Integeate-58665	Yes
240	Naxi	28.8	105.4	369	1984	2012		Yes
241	Arrecife / Lanzarote	29	-13.6	20	1998	2018
242	San Antonio	29.5	-98.5	242	1955	1972
244	Leshan	29.5	103.8	424	1974	1990
243	Emeishan	29.5	103.3	3137	1959	2015	[Yang et al. 2018]-Integeate-56385	Yes
245	Shapingba	29.6	106.5	259	1959	2012
246	Lushan	29.6	116	1243	1960	1990
247	Apalachicola	29.7	-85	14	1950	1974
248	Lhasa	29.7	91.1	3658	1958	2013
249	Tunxi	29.7	118.3	143	1993	2015	[Yang et al. 2018]-Integeate-58531	Yes
250	Lake Charles	30.1	-93.2	4	1950	1978
251	Giza	30.1	31.2	21	1964	2016
252	Cairo	30.1	31.3	36	1969	2016
253	Bahtim	30.2	31.3	17	1969	1997
254	Hangzhou 1	30.2	120.2	42	1961	2000		Yes
255	Hangzhou 2	30.3	120.2	7	1960	2012
256	Cixi	30.3	121.2	7	1962	1990
257	Wuhan 1	30.6	114.1	23	1961	2015
258	Wuhan 2	30.6	114.3	23	1958	2013
259	Tahrir	30.7	30.7	16	1964	1996
260	Chengdu 1	30.7	103.8	539	2004	2015
261	Chengdu 2	30.7	104	506	1958	2015
262	Yichang 1	30.7	111.1	70	1958	2013
263	Yichang 2	30.7	111.3	50	1961	2000
264	Tanegashima	30.7	131	17	1964	1973
265	Nanchong	30.8	106.1	298	1974	1990
266	Wanxian	30.8	108.4	433	1960	1990
267	El Arish	31.1	33.8	17	1986	1999
268	Chamdo	31.2	97.2	3175	1958	2015	[Yang et al. 2018]-Integeate-56137	Yes
269	Shanghai1	31.2	121.4	4	1958	2015	[Yang et al. 2018]-Integeate-58362	Yes
270	Mersa-Matrouh	31.3	27.2	38	1982	1997
271	Shanghai2	31.4	121.5	4	1991	2015
273	Mianyang	31.5	104.7	471	1978	2013
272	Nagchu	31.5	92.1	4507	1961	2015	[Yang et al. 2018]-Integeate-55299	Yes
276	Kagoshima	31.6	130.6	4	1961	2017	[Ma et al. 2022]-Integeate-47827	Yes
274	Lahore City	31.6	74.3	214	1968	1994
275	Ganzi	31.6	100	3394	1994	2015	[Yang et al. 2018]-Integeate-56146	Yes
277	El Paso	31.8	-106.4	1205	1950	1976
278	Jerusalem	31.8	35.2	809	1953	1966
279	Hefei	31.9	117.2	24	1959	2013
280	Miyazaki	31.9	131.4	9	1961	2007
281	Midland	32	-102.2	875	1954	1972
282	Bet Dagan	32	34.8	30	1964	1985
283	Nanjing	32	118.8	9	1959	2013
284	Savannah State College	32.1	-81.1	11	1986	2000
285	Lvsi	32.1	121.6	6	1992	2015
286	Gushi	32.2	115.7	57	1961	2013
287	Bermuda	32.3	-64.3	8	1992	2011
288	Geer	32.5	80.1	4278	1972	2015	[Yang et al. 2018]-Integeate-55228	Yes
289	Funchal	32.6	-16.9	58	1957	2017
290	Ankang	32.7	109	291	1962	2013
291	Fukue	32.7	128.8	25	1963	1972
292	Nagasaki	32.7	129.9	27	1961	2007		Yes
293	Shimizu/Ashizuri	32.7	133	30	1961	2008		Yes
294	Fort Worth	32.8	-97.1	175	1950	1971
296	Kumamoto	32.8	130.7	38	1962	2007
295	Hongyuan	32.8	102.6	3493	1994	2015	[Yang et al. 2018]-Integeate-56173	Yes
297	Charleston	32.9	-80	21	1951	1976
298	Yushu	33	97	3703	1961	2015	[Yang et al. 2018]-Integeate-56029	Yes
299	Nanyang	33	112.6	129	1993	2015	[Yang et al. 2018]-Integeate-57178	Yes
300	Porto Santo	33.1	-16.4	78	1957	2016
301	Hachijojima	33.1	139.8	151	1972	2002
302	Griffin	33.2	-84.4	305	1951	1962
303	Oita	33.2	131.6	5	1963	2007
304	Saga	33.3	130.3	6	1961	2007		Yes
305	Murotomisaki	33.3	134.2	19	1961	1973
306	Shionomisaki	33.5	135.8	73	1961	2008
307	Casablanca	33.6	-7.7	55	1970	2016
308	Yancheng	33.6	114	61	1962	1990
310	Fukuoka	33.6	130.4	699	1960	2020
311	Kochi	33.6	133.6	1	1961	2007		Yes
309	Huaian	33.6	119	14	1994	2015	[Yang et al. 2018]-Integeate-58141	Yes
312	Atlanta	33.7	-84.4	315	1952	1971
313	Los Angeles	33.9	-118.4	32	1953	1975
314	Matsuyama	33.9	132.8	32	1961	2002
315	Riverside	34	-117.3	320	1952	1969
316	Shimonoseki	34	130.9	3	1962	2007
317	Los Angeles University	34.1	-118.5	40	1952	1963
318	Tokushima	34.1	134.6	2	1961	1973
319	Izuhara	34.2	129.3	4	1963	2007		Yes
320	Wakayama	34.2	135.2	14	1961	1973
321	Goodwin Creek	34.3	-89.9	98	1995	2019
322	Jinghe	34.3	108.9	410	1959	2013
323	Takamatsu	34.3	134.1	9	1962	2007
324	Hiroshima	34.4	132.5	4	1961	2007
325	Guoluo	34.5	100.3	3719	1993	2015	[Yang et al. 2018]-Integeate-56043	Yes
326	Omaezaki	34.6	138.2	45	1973	2002
327	Little Rock	34.7	-92.2	81	1953	1974
328	Zhengzhou	34.7	113.7	109	1959	2013		Yes
329	Okayama	34.7	133.9	3	1961	1973
330	Kobe	34.7	135.2	5	1962	1973
331	Nara	34.7	135.8	104	1962	2007		Yes
332	Mokpo	34.8	126.4	53	1986	2018
333	Osaka	34.8	135.5	6	1962	2007		Yes
334	Oshima	34.8	139.4	74	1973	2002		Yes
335	Hamada	34.9	132.1	19	1961	2002		Yes
336	Albuquerque	35	-106.6	1631	1950	2006
337	Kyoto	35	135.7	41	1961	1973
338	Nagoya	35	137	51	1961	2007
339	Shizuoka	35	138.4	14	1974	2002
340	Pusan	35.1	129	69	1986	2017
341	Hikone	35.3	136.3	87	1961	2007		Yes
342	Oklahoma City	35.4	-97.6	397	1952	1974
343	Yonago 1	35.4	133.3	7	1961	2007		Yes
344	Yonago 2	35.4	133.4	7	1961	2007
345	Jining	35.5	116.6	43	1964	1990
346	Matsue	35.5	133.1	17	1961	1973
347	Maizuru	35.5	135.3	2	1961	2007		Yes
348	Lvxian	35.6	118.8	107	1990	2015	[Yang et al. 2018]-Integeate-54936	Yes
349	Houma	35.7	111.4	434	1961	2013		Yes
350	Kofu	35.7	138.6	273	1975	2002
351	Tokyo	35.7	139.8	6	1961	2007		Yes
352	Choshi	35.7	140.9	20	1973	2002		Yes
353	Qrendi	35.8	14.4	135	1964	1977
354	Yuzhong	35.9	104.2	1874	1960	2015	[Yang et al. 2018]-Integeate-52983	Yes
355	Oak Ridge	36	-84.3	287	1950	2006
356	Guyuan	36	106.3	1752	1985	2015	[Yang et al. 2018]-Integeate-53817	Yes
357	Las Vegas / McCarran	36.1	-115.2	662	1950	1978
358	Greensboro	36.1	-80	270	1954	1974
359	Lanzhou	36.1	103.9	1517	1960	2003
360	Anyang	36.1	114.4	76	1960	1990		Yes
361	Fukui	36.1	136.2	9	1974	2002
362	Tateno	36.1	140.1	25	1958	2020
364	Saigo	36.2	133.3	27	1961	1973
365	Takayama	36.2	137.3	560	1961	1973
363	Golmud1	36.2	94.6	2806	1958	2015	[Yang et al. 2018]-Integeate-52818	Yes
366	Matsumoto	36.3	138	610	1973	2006		Yes
367	Golmud2	36.4	94.9	2808	1958	2000
368	Maebashi	36.4	139.1	112	1972	2002		Yes
369	Cadiz	36.5	-6.3	16	1996	2019
370	Desert Rock	36.6	-116	1007	1999	2019
371	Billings	36.6	-97.3	318	1994	2018
372	Southern Great Plains Arm E13	36.6	-82.5	318	1998	2018
374	Yan'an	36.6	109.5	958	1990	2015
375	Utsunomiya	36.6	139.9	119	1961	2002
373	Xining	36.6	101.9	2244	1959	2015	[Yang et al. 2018]-Integeate-52866	Yes
376	Jerez	36.7	-6.1	27	2006	2019
377	Malaga	36.7	-4.5	61	2003	2019
378	Jinan	36.7	117	52	1960	2013
379	Toyama	36.7	137.2	9	1961	2002		Yes
380	Tunis-Carthage	36.8	10.2	4	1964	2008
381	Pantelleria Is.	36.8	12	170	1959	2008	[Manara et al. 2016, 2019]-Integeate-F_PANTELLERIA_ISOLA	Yes
382	Chesapeake	36.9	-75.7	37	2001	2013
383	Almeria	36.9	-2.4	20	1997	2017
384	Faro-Airpt.	37	-8	8	1964	2016
385	Onahama	37	140.9	3	1963	2007
386	Arenosillo	37.1	-6.7	45	2010	2019
387	Granada	37.1	-3.6	687	2001	2019
389	Takada	37.1	138.3	13	1961	2006
388	Hotan	37.1	79.9	1387	1958	2013	[Yang et al. 2018]-Integeate-51828	Yes
390	Grenada Airport	37.2	-3.8	573	2004	2019
391	Bluefield State College	37.3	-81.2	803	1989	2004
392	Huelva	37.3	-6.9	19	1997	2019
393	Gangcha	37.3	100.1	3302	1993	2015	[Yang et al. 2018]-Integeate-52754	Yes
394	Wajima	37.4	136.9	5	1972	2009
395	Wuwei	37.5	103.3	1766	1961	2013	[Yang et al. 2018]-Integeate-52679	Yes
396	Fushan	37.5	121.4	33	1960	2015	[Yang et al. 2018]-Integeate-54764	Yes
397	Seoul	37.6	127	86	1986	2017
398	Ponta Delgada / Nordela Arpt	37.7	-25.7	71	1964	1984
399	Dodge City	37.8	-100	791	1954	1978
400	Ponta Delgada	37.8	-25.7	35	1964	1984
401	San Javier Airport	37.8	-0.8	2	2005	2019
402	Taiyuan	37.8	112.6	784	1959	2013
403	Kangnung	37.8	128.9	26	1986	2017
404	Fukushima	37.8	140.5	67	1962	2007
406	Niigata	37.9	139.1	2	1973	2002		Yes
405	Trapani / Birgi	37.9	12.5	14	1960	2012	[Manara et al. 2016, 2019]-Integeate-F_TRAPANI_BIRGI	Yes
407	Murcia	38	-1.2	61	1981	2017
408	Filadelfia / Athen	38	23.7	138	1960	1985
409	Haeju	38	125.7	79	1965	1992
410	Messina	38.2	15.6	59	1960	2001	[Manara et al. 2016, 2019]-Integeate-F_MESSINA	Yes
411	Elizabeth City State Univ.	38.3	-76.3	4	1987	2012		Yes
412	Alicante Airport	38.3	-0.6	31	2004	2019
413	Yamagata	38.3	140.4	152	1961	2007		Yes
414	Sendai	38.3	140.9	38	1963	2007		Yes
415	Davis, Sacramento	38.5	-121.8	15	1950	1967
416	Evora	38.5	-7.9	309	1964	2011
417	Yinchuan	38.5	106.2	1112	1960	2013
418	Evora	38.6	-7.9	309	1964	2011
419	Minqin	38.6	103.1	1354	1958	2015	[Yang et al. 2018]-Integeate-52681	Yes
420	Angra do Heroismo	38.7	-27.2	90	1964	1989
421	Lisboa / Inst.Geofis.	38.7	-9.2	77	1964	2011
422	Ustica Is.	38.7	13.2	250	1961	1996	[Manara et al. 2016, 2019]-Integeate-F_USTICA_ISOLA	Yes
423	Badajoz	38.9	-7	185	2003	2019
424	Ibiza	38.9	1.4	10	1997	2019
426	Sakata	38.9	139.9	3	1961	2002		Yes
425	Dalian	38.9	121.6	62	1963	2015	[Yang et al. 2018]-Integeate-54662	Yes
430	Crotone	39	17.1	158	1960	1988	[Manara et al. 2016, 2019]-Integeate-F_CROTONE	Yes
427	Washington D.C. / Sterling	39	-77.5	87	1950	2006
428	Ciudad-Real	39	-3.9	628	2000	2019
429	Albacete	39	-1.9	674	1999	2019
431	Ruoqiang	39	88.2	950	1958	2013
432	Pyongyang	39	125.8	35	1965	1992
433	Grand Junction / Walker Field	39.1	-108.5	1481	1954	1972
435	Ofunato	39.1	141.7	37	1964	1973
434	Tianjin	39.1	117.1	3	1959	2015	[Yang et al. 2018]-Integeate-54527	Yes
436	Manhattan (Kansas)	39.2	-96.6	347	1958	1969
438	Cagliari / Elmas	39.3	9.1	18	1959	2012	[Manara et al. 2016, 2019]-Integeate-F_CAGLIARI_ELMAS	Yes
437	Ely / Yelland	39.3	-114.9	1907	1954	1976
439	Yijinhuoluoqi 1	39.3	109.8	1460	1960	2013		Yes
440	Yijinhuoluoqi 2	39.4	109.8	1460	1961	1990
441	Leting	39.4	118.9	11	1993	2015	[Yang et al. 2018]-Integeate-54539	Yes
442	Caceres	39.5	-6.3	405	1983	2019
443	Valencia Airport	39.5	-0.5	62	1997	2018
444	Kashgar	39.5	76	1289	1958	2015	[Yang et al. 2018]-Integeate-51709	Yes
445	Toledo	39.6	-4.3	910	1986	2019
446	Palma de Mallorca	39.6	2.6	6	1982	2019
447	Solar Radiation Res.Lab.	39.7	-105.2	1829	1991	2018
448	Corvo	39.7	-31.1	28	1964	1981
449	Akita	39.7	140.1	9	1963	2018		Yes
450	Morioka	39.7	141.2	155	1963	2007		Yes
451	Miyako	39.7	142	43	1961	2007
453	Xianghe	39.8	116.5	32	1988	2014
452	Jiuquan	39.8	98.5	1477	1993	2015	[Yang et al. 2018]-Integeate-52533	Yes
454	Beijing	39.9	116.3	55	1958	2015
455	Palinuro,C.	40	15.3	185	1964	2002	[Manara et al. 2016, 2019]-Integeate-F_CAPO_PALINURO	Yes
456	Boulder 1	40.1	-106	1577	1992	2014
457	Boulder 2	40.1	-105.2	1689	1978	2017
458	Bondville 1	40.1	-88.6	213	1995	2019
459	Bondville 2	40.1	-88.4	213	2002	2018
461	Datong	40.1	113.3	1068	1960	2013
460	Dunhuang 1	40.1	94.8	1138	1958	2015	[Yang et al. 2018]-Integeate-52418	Yes
462	Boulder 3	40.2	-105.4	1689	1996	2019
463	Coimbra Arpt	40.2	-8.5	170	1964	2016
464	Coimbra	40.2	-8.4	141	1964	2010
465	Dunhuang 2	40.2	94.7	1139	1958	2000
466	Penhas Douradas	40.4	-7.6	1380	1964	1990
467	Teruel	40.4	-1.1	900	2008	2019
468	Madrid - Universitaet	40.5	-3.7	664	1981	2016
469	Madrid/Barajas Airport	40.5	-3.6	582	2006	2019
471	Hachinohe	40.5	141.5	27	1974	2002
470	Fengcheng	40.5	124.1	58	1962	1990	[Yang et al. 2018]-Integeate-54494	Yes
472	Alghero	40.6	8.3	40	1959	1987	[Manara et al. 2016, 2019]-Integeate-F_ALGHERO	Yes
473	Thessaloniki	40.6	23	60	1994	2019
476	Brindisi	40.7	18	15	1959	2012	[Manara et al. 2016, 2019]-Integeate-F_BRINDISI	Yes
474	Rock Springs Pennsylvania	40.7	-77.9	376	1999	2019
475	Rocksprings / Penn State	40.7	-77.7	376	2002	2018
477	Tumotezuoqi	40.7	111.2	1020	1960	1991		Yes
481	Aomori	40.8	140.8	3	1961	2014	[Ma et al. 2022]-Integeate-47575	Yes
478	Salt Lake City	40.8	-112	1288	1951	2003
479	Sayville	40.8	-73.1	17	1950	1962
480	Tortosa	40.8	0.5	0	1967	2019
483	Napoli	40.9	14.3	72	1961	1985	[Manara et al. 2016, 2019]-Integeate-F_NAPOLI	Yes
482	Olbia A	40.9	9.5	13	1964	1986	[Manara et al. 2016, 2019]-Integeate-F_OLBIA	Yes
484	Salamanca	41	-5.9	803	2003	2019
485	Porto	41.1	-8.6	93	1964	2008
486	Bitola	41.1	21.4	586	1965	1988
487	Reus Arpt	41.2	-1.2	73	2009	2019
488	Aksu	41.2	80.2	1103	1993	2015	[Yang et al. 2018]-Integeate-51628	Yes
489	Barcelona Airport	41.3	2.1	10	2004	2019
490	Tashkent	41.3	69.3	428	1964	1992
491	Omaha	41.4	-96	399	1958	1975
492	Cleveland	41.4	-81.9	245	1956	1970
493	Barcelona	41.4	2.2	25	1965	2019
495	Amendola	41.5	15.7	56	1959	2009	[Manara et al. 2016, 2019]-Integeate-F_AMENDOLA	Yes
494	Newport, Eppley Lab.	41.5	-71.3	15	1950	1969
496	Soria	41.6	-2.5	1090	2006	2018
497	Zaragoza	41.6	-1	263	2004	2019
498	Lerida	41.6	0.6	201	1997	2017
499	Hailiutu	41.6	108.5	1288	1992	2015	[Yang et al. 2018]-Integeate-53336	Yes
500	Chaoyang	41.6	120.5	169	1964	2013	[Yang et al. 2018]-Integeate-54324	Yes
501	Valladolid	41.7	-4.8	734	1996	2019
502	Tbilisi	41.7	45	427	1964	1988
504	Kyongsong	41.7	129.7	8	1965	1992
503	Shenyang	41.7	123.5	43	1958	2015	[Yang et al. 2018]-Integeate-54342	Yes
508	Hakodate	41.8	140.8	35	1961	2014	[Ma et al. 2022]-Integeate-47430	Yes
506	Roma / Ciampino	41.8	12.6	131	1960	2005	[Manara et al. 2016, 2019]-Integeate-F_ROMA_CIAPINO	Yes
505	Braganca	41.8	-6.7	691	1964	2016
507	Kuqa	41.8	82.9	1073	1958	1990
509	Gerona Airport	41.9	2.8	127	2004	2019
510	Ajaccio	41.9	8.8	4	1982	2017		Yes
511	Skopje	42	21.5	240	1964	1975
513	Urakawa	42	142.8	33	1974	2002
512	Ejina	42	101.1	940	1992	2015	[Yang et al. 2018]-Integeate-51567	Yes
514	Vigna di Valle	42.1	12.2	262	1959	2012	[Manara et al. 2016, 2019]-Integeate-F_VIGNA_DI_VALLE	Yes
515	Bar	42.1	19.1	6	1965	1987
516	Yanqi	42.1	86.6	1055	1993	2015	[Yang et al. 2018]-Integeate-52267	Yes
517	Vigo Airport	42.2	-8.6	255	2004	2019
518	Muroran	42.3	141	40	1974	2002
522	Pescara	42.4	14.2	16	1959	1985	[Manara et al. 2016, 2019]-Integeate-F_PESCARA	Yes
519	Medford	42.4	-122.9	405	1950	1978
520	Ithaca	42.4	-76.5	180	1951	1968
521	Boston	42.4	-71.1	48	1950	1965
523	Logrono-Agoncillo	42.5	-2.3	353	1981	2019
524	Terminillo, M.	42.5	13	1875	1967	2002
525	Vilanova-Arousa	42.6	-8.8	15	2003	2017
526	Ponferrada	42.6	-6.6	550	2009	2018
527	Leon	42.6	-5.7	914	1998	2019
528	Bastia	42.6	9.5	8	1992	2019
529	Pianosa	42.6	10.1	27	1964	1975
530	Cherni Vrah	42.6	23.3	2286	1968	1989
531	Perpignan	42.7	2.9	43	1981	2019
532	Pristina	42.7	21.2	573	1968	1985
533	Sofia	42.7	23.3	588	1964	2009
534	East Lansing	42.8	-84.5	268	1950	1967
535	Cener	42.8	-1.6	471	2010	2020
536	Hami	42.8	93.5	737	1961	2013
537	Yanji	42.8	129.5	177	1960	2013
538	Suttsu	42.8	140.2	33	1974	2002
543	Obihiro	42.9	143.2	38	1961	2014	[Ma et al. 2022]-Integeate-47417	Yes
539	Santiago Arpt	42.9	-8.4	370	2005	2019
540	Vitoria	42.9	-1.7	550	2001	2019
541	Turpan	42.9	89.2	35	1961	2013
542	Kutchan	42.9	140.8	176	1962	1973
544	Hyeres/Ile Levant	43	6.5	133	1978	2019
546	Sapporo	43.1	141.3	17	1961	2018	[Ma et al. 2022]-Integeate-47412	Yes
545	Vladivostok	43.1	131.9	138	1964	2014
547	Carcassonne	43.2	2.3	130	1980	2017
548	Varna	43.2	27.9	14	1966	1991
552	Nemuro	43.3	145.6	26	1961	2009	[Ma et al. 2022]-Integeate-47420	Yes
549	La Coruna Airport	43.3	-8.4	97	1996	2017
550	Bilbao-Sondica	43.3	-2.9	40	1996	2019
551	San Sebastian	43.3	-2.1	258	1996	2019
553	La Coruna	43.4	-8.4	58	1996	2019
554	Oviedo	43.4	-5.9	335	1981	2017
555	Pau	43.4	-0.4	188	1978	1995
556	Marignane	43.4	5.2	4	1980	2019		Yes
557	Santander	43.5	-3.8	78	1987	2019
558	Marseille / Marignane	43.5	5.2	6	1980	2010
559	Pleven	43.5	24.6	131	1964	1987
562	Ancona	43.6	13.5	105	1959	1977	[Manara et al. 2016, 2019]-Integeate-F_ANCONA_CAPPUCCINI	Yes
560	Montpellier	43.6	4	5	1975	2017
561	Nice	43.6	7.2	4	1972	2019
563	Dalanzadgad	43.6	104.4	1469	1966	2018		Yes
564	Tongliao	43.6	122.3	180	1962	2013	[Yang et al. 2018]-Integeate-54135	Yes
569	Pisa / S.Giusto	43.7	10.4	1	1960	2012	[Manara et al. 2016, 2019]-Integeate-F_PISA_SAN_GIUSTO	Yes
565	Sioux Falls	43.7	-96.6	195	2004	2018
566	Elora Research Stn.	43.7	-80.4	376	1971	1994
567	Toronto	43.7	-79.4	116	1950	2000
568	Portland	43.7	-70.3	19	1950	1974
570	Zlatibor	43.7	19.7	1029	1964	1977
571	Erlianhaote	43.7	112	965	1958	2015	[Yang et al. 2018]-Integeate-53068	Yes
572	Toronto Met.Res.St.	43.8	-79.6	149	1969	1987
573	Urumqi	43.8	87.6	918	1959	2013
574	Asahikawa	43.8	142.4	120	1961	2007
578	Yining 1	43.9	81.3	850	1961	2015	[Yang et al. 2018]-Integeate-51431	Yes
575	Sable Island	43.9	-60	4	1970	1986
576	Mont-De-Marsan	43.9	-0.5	62	2010	2019
577	Sarajevo	43.9	18.4	505	1965	1975
579	Changchun	43.9	125.2	237	1959	2013
581	Mele,C.	44	8.2	221	1964	2002	[Manara et al. 2016, 2019]-Integeate-R_CAPO_MELE	Yes
580	Montauban	44	1.4	107	2010	2019
582	Yining 2	44	81.3	663	1961	2000
583	Xilinhaote	44	116.1	990	1990	2015
584	Rumoi	44	141.6	24	1974	2002
585	Abashiri	44	144.3	38	1962	2007		Yes
586	Rapid City	44.1	-103.1	966	1952	1974
587	Millau	44.1	3	715	1969	2019		Yes
588	Carpentras	44.1	5.1	99	1971	2017
590	Colle San Bernardo	44.2	8.1	980	1990	2016	[Manara et al. 2016, 2019]-COLLE_SAN_BERNARDO	Yes
589	Agen	44.2	0.6	61	1969	2017
591	Negotin	44.2	22.6	42	1965	1983
592	Craiova	44.2	23.9	192	1971	2017
593	Constanta	44.2	28.6	13	1964	2004
594	Craiova	44.3	23.9	192	1971	2017
596	BERGALLI	44.4	8.2	385	1959	1987	[Manara et al. 2016, 2019]-BERGALLI	Yes
597	Genova / Sestri	44.4	8.9	55	1991	2016	[Manara et al. 2016, 2019]-Integeate-F_GENOVA_SESTRI	Yes
595	Biscarrosse	44.4	-1.3	33	1984	2019
598	FOSSANO	44.5	7.8	403	1964	2017	[Manara et al. 2016, 2019]-FOSSANO	Yes
600	Bologna	44.5	11.3	49	1990	2016	[Manara et al. 2016, 2019]-Integeate-F_BOLOGNA	Yes
599	PONZONE_BRIC_BERTON	44.5	8.5	773	1994	2016	[Manara et al. 2016, 2019]-PONZONE_BRIC_BERTON	Yes
601	Bucharest	44.5	26.1	91	1959	1988
602	Montelimar	44.6	4.7	73	1995	2019
603	Embrun	44.6	6.5	871	1980	2019		Yes
606	ACQUI_TERME	44.7	8.5	215	1992	2016	[Manara et al. 2016, 2019]-ACQUI_TERME	Yes
607	CAPANNE_DI_COSOLA	44.7	9.2	1550	1990	2016	[Manara et al. 2016, 2019]-CAPANNE_DI_COSOLA	Yes
605	TREISO	44.7	8.1	376	1992	2016	[Manara et al. 2016, 2019]-TREISO	Yes
604	Halifax	44.7	-63.6	70	1966	1996
609	CASTELLAR_PONZANO	44.8	8.9	146	1999	2016	[Manara et al. 2016, 2019]-CASTELLAR_PONZANO	Yes
608	Bordeaux	44.8	-0.7	49	1978	2013
610	Banja Luka	44.8	17.2	153	1964	1991
611	Beograd / Zeleno-Brdo	44.8	20.5	243	1964	1990
615	ALESSANDRIA_LOBBI	44.9	8.7	88	1990	2016	[Manara et al. 2016, 2019]-ALESSANDRIA_LOBBI	Yes
614	CARMAGNOLA	44.9	7.7	88	1994	2016	[Manara et al. 2016, 2019]-CARMAGNOLA	Yes
613	COLLE_BERCIA	44.9	6.8	2200	1998	2016	[Manara et al. 2016, 2019]-COLLE_BERCIA	Yes
612	Aurillac	44.9	2.4	639	2010	2019
616	Kitamiesashi	44.9	142.6	88	1975	2002
618	Torino-Bric 1	45	7.7	709	1994	2016	[Manara et al. 2016, 2019]-BAUDUCCHI	Yes
617	CUMIANA	45	7.4	327	1990	2016	[Manara et al. 2016, 2019]-CUMIANA	Yes
620	MONTECHIARO_D_ASTI	45	8.1	200	1991	2016	[Manara et al. 2016, 2019]-MONTECHIARO_D_ASTI	Yes
619	Torino-Bric 2	45	7.8	709	1990	2016
626	AVIGLIANA	45.1	7.4	340	1992	2016	[Manara et al. 2016, 2019]-AVIGLIANA	Yes
625	BORGONE	45.1	7.3	400	1993	2016	[Manara et al. 2016, 2019]-BORGONE	Yes
627	CASALE_MONFERRATO	45.1	8.5	118	1990	2016	[Manara et al. 2016, 2019]-CASALE_MONFERRATO	Yes
623	LE_SELLE	45.1	6.9	1980	1991	2016	[Manara et al. 2016, 2019]-LE_SELLE	Yes
624	PIETRASTRETTA	45.1	7.1	520	1992	2014	[Manara et al. 2016, 2019]-PIETRASTRETTA	Yes
622	PRERICHARD	45.1	6.7	1353	1962	1994	[Manara et al. 2016, 2019]-PRERICHARD	Yes
621	Kentville	45.1	-64.5	49	1993	2016
628	Torino	45.2	7.7	282	1962	1985	[Manara et al. 2016, 2019]-CASELLE	Yes
629	VEROLENGO	45.2	8	163	1991	2016	[Manara et al. 2016, 2019]-VEROLENGO	Yes
631	CANDIA	45.3	7.9	226	2000	2016	[Manara et al. 2016, 2019]-CANDIA	Yes
630	Ottawa Int. Airpt.	45.3	-75.7	116	1950	1997
634	Wakkanai	45.4	141.7	3	1961	2014	[Ma et al. 2022]-Integeate-47401	Yes
633	Milano / Linate	45.4	9.3	103	1962	2004	[Manara et al. 2016, 2019]-Integeate-F_MILANO_LINATE	Yes
632	Grenoble -St Geoirs	45.4	5.3	384	2010	2019
637	Venezia / Tessera	45.5	12.3	6	1959	1987	[Manara et al. 2016, 2019]-Integeate-F_VENEZIA_TESSERA	Yes
635	Montreal / Dorval Int. Airpt.	45.5	-73.8	31	1965	1996
636	Montreal	45.5	-73.6	133	1961	1984
638	Portoroz	45.5	13.6	92	1975	1991
639	St. Cloud	45.6	-94.1	315	1950	1974
640	Chambery-Aix	45.6	5.9	235	2010	2019
642	Trieste	45.7	13.8	20	1971	2013	[Manara et al. 2016, 2019]-Integeate-R_TRIESTE_HORTIS	Yes
641	Lyon - Bron	45.7	4.9	197	2009	2019
647	Harbin	45.8	126.8	146	1960	2015	[Yang et al. 2018]-Integeate-50953	Yes
643	Limoges	45.8	1.3	282	1968	2019
644	Clermont-Ferrand	45.8	3.2	332	1978	2019
645	Zagreb	45.8	16	157	1964	2001
646	Timisoara neu	45.8	21.3	90	1964	2017
648	Fredericton	45.9	-66.6	40	1962	1998
649	Gd-St.-Bernard	45.9	7.2	2472	1982	2007		Yes
650	Pian Rosa M.	45.9	7.7	3488	1964	1986
651	Sljeme / Puntijarka	45.9	16	988	1965	2011
655	Udine/Rivolto 3	46	13.2	51	1959	1977	[Manara et al. 2016, 2019]-Integeate-F_UDINE_CAMPOFORMIDO	Yes
654	Udine/Rivolto 2	46	13.1	51	1964	2005	[Manara et al. 2016, 2019]-R_UDINE_RIVOLTO	Yes
652	Lugano	46	9	273	1981	2007
653	Udine/Rivolto 1	46	13	51	1964	2005
656	DOMODOSSOLA	46.1	8.3	252	1990	2016	[Manara et al. 2016, 2019]-DOMODOSSOLA	Yes
657	Astoria	46.2	-123.9	7	1954	1974
658	La Rochelle	46.2	-1.2	4	1972	2017
659	Geneve-Cointrin	46.2	6.1	420	1981	2019
660	Sion	46.2	7.3	482	1981	2007
661	Locarno-Monti	46.2	8.8	380	1939	2019
662	Charlottetown	46.3	-63.1	48	1972	1994
663	Macon	46.3	4.8	218	1968	2017		Yes
664	La Dole	46.4	6.1	1670	1981	2019		Yes
665	Corvatsch	46.4	9.8	3315	1981	2019		Yes
668	Bozen	46.5	11.3	241	1959	1987	[Manara et al. 2016, 2019]-Integeate-F_BOLZANO	Yes
666	Sault Ste Marie	46.5	-84.4	221	1952	1974
667	San Bernardino	46.5	9.2	1639	1982	2007
669	Odessa	46.5	30.6	64	1964	2019
672	Suolun	46.6	121.2	500	1992	2015	[Yang et al. 2018]-Integeate-50843	Yes
670	Jungfraujoch	46.6	8	3576	1981	2019
671	Grimsel-Hospiz	46.6	8.3	1980	1990	2007
677	Tacheng	46.7	83	535	1993	2015	[Yang et al. 2018]-Integeate-50873	Yes
673	La Roche-Sur-Yon	46.7	-1.4	91	1986	2019
674	Guetsch ob Andermatt	46.7	8.6	2287	1981	2007
675	Dobbiaco	46.7	12.2	1222	1990	2009
676	Klagenfurt	46.7	14.3	452	1964	2019
686	Jiamusi	46.8	130.3	81	1961	2015	[Yang et al. 2018]-Integeate-50873	Yes
678	Bismarck	46.8	-100.8	506	1954	2001		Yes
679	Saint-Pierre	46.8	-56.2	3	1973	2013
680	Payerne 1	46.8	6.9	490	1981	2020
681	Payerne 2	46.8	7	490	1981	2010
682	Weissfluhjoch	46.8	9.8	2670	1936	2019
683	Davos-Dorf	46.8	9.9	1590	1978	2007
684	Cluj-Napoka	46.8	23.6	410	1964	2017
685	Aralskoe More	46.8	61.7	62	1964	1988
687	Caribou	46.9	-68	195	1950	1976
688	Chateauroux Deols	46.9	1.7	158	2010	2019
689	Altdorf	46.9	8.6	449	1981	2007
690	Kecskemet	46.9	19.8	113	1965	1979
691	Szarvas	46.9	20.5	85	1981	2006
692	Yuzhno-Sakhalinsk	46.9	142.7	22	1964	2010
693	Bern/Zollikofen	47	7.5	553	1981	2007
694	Luzern	47	8.3	454	1981	2007
695	Graz	47	15.5	342	1966	2019		Yes
696	Kishinev/Chisinau	47	28.8	205	2004	2019
697	Bourges	47.1	2.4	161	1988	2019
698	La Chaux-de-Fonds	47.1	6.8	1018	1981	2007
699	Sonnblick	47.1	13	3106	1964	2019
700	Nantes	47.2	-1.6	27	1987	2019
701	Iasi	47.2	27.6	90	1964	2017
702	Dijon	47.3	5.1	222	1977	2019		Yes
703	Besancon	47.3	6	307	1993	2019
704	Saentis	47.3	9.4	2500	1987	2019		Yes
705	Innsbruck	47.3	11.4	577	1969	2019
706	Tours	47.4	0.7	108	1978	2017		Yes
707	ZH-UZI	47.4	8.5	437	1939	2007
708	Zuerich-SMA	47.4	8.6	556	1981	2007
709	St. Gallen	47.4	9.4	1030	1982	2007
710	Budapest	47.4	19.2	138	1964	2005
711	Seattle Tacoma	47.5	-122.3	137	1952	1976
712	St. John's (Airpt.)	47.5	-52.8	114	1961	1996
713	Beaucouze	47.5	-0.6	0	2009	2019
714	Zuerich-Kloten	47.5	8.5	436	1959	2019
715	Fussach	47.5	9.7	400	1993	2019
716	Debrecen	47.5	21.6	123	1964	1985
717	Basel-Binningen	47.6	7.6	317	1981	2019
718	Konstanz	47.7	9.2	450	1978	1992
719	Sopron	47.7	16.6	427	1964	2005
720	Altay	47.7	88.1	735	1960	2013
727	Fuyu	47.8	124.5	162	1993	2015	[Yang et al. 2018]-Integeate-50742	Yes
721	Auxerre	47.8	3.6	207	1977	2019		Yes
722	Hohenpeissenberg	47.8	11	990	1959	2017		Yes
723	Salzburg	47.8	13	435	1958	2002
724	Salzburg / Freisal	47.8	13.1	420	1958	2019		Yes
725	Feuerkogel	47.8	13.7	1598	1965	1979
726	Ulyasutay	47.8	96.9	1751	1964	2018
728	Colmar	47.9	7.4	211	1992	2019
729	Hurbanovo	47.9	18.2	115	1981	2019
730	Ulan-Bator 1	47.9	106.8	1264	1964	2018
731	Ulan-Bator 2	47.9	107	1264	1964	2015
732	Freiburg	48	7.9	269	1973	1998
733	Rennes	48.1	-1.7	37	1968	2010
734	Steyr	48.1	14.6	309	1964	1983
735	Glasgow	48.2	-106.6	700	1957	1973
736	Wien Gl 58 - 60 mean	48.2	16.4	200	1959	2017		Yes
737	Wien-Grossendorf	48.2	16.6	153	1988	2019
738	Bratislava	48.2	17.1	289	1964	2019
739	Fort Peck	48.3	-105.1	634	2003	2018
740	Wien-Hohe-Warte	48.3	16.4	202	1964	2019
741	Obersiebenbrunn	48.3	16.7	150	1967	1981
742	Weihenstephan	48.4	11.7	469	1961	2019
743	Brest	48.5	-4.4	99	1988	2019
744	St-Brieuc	48.5	-2.9	135	2010	2019
745	Chartres	48.5	1.5	155	2010	2019
746	Khabarovsk	48.5	135.2	87	1964	1994
747	Strassburg	48.6	7.6	153	1975	2019
748	Passau	48.6	13.5	412	1980	1996
749	Palaiseau SIRTA Observatory	48.7	2.2	156	2006	2019
750	Paris-Orly	48.7	2.4	89	2003	2019
751	Nancy-Essey	48.7	6.2	225	1968	2019
752	Trebisov	48.7	21.7	107	1987	2019
753	Trappes	48.8	2	168	1968	2017
754	Paris-Montsouris	48.8	2.3	75	1978	2019
755	Stuttgart	48.8	9.2	318	1980	1998
756	Normandin	48.9	-72.5	137	1958	1994
757	Kucharovice	48.9	16.1	334	1986	2019
758	Roissy-en-France	49	2.5	108	1991	2019
759	Weissenburg	49	11	428	1982	1998
760	Poprad-Ganovce	49	20.3	706	2008	2019
761	Churanov	49.1	13.6	1122	1986	2019
762	Strbske Pleso	49.1	20.1	1353	1973	2007
768	Hailaer	49.2	119.8	610	1961	2015	[Yang et al. 2018]-Integeate-50527	Yes
763	Nanaimo (Departure Bay)	49.2	-124	8	1959	1986
764	Jersey Is. (Airport)	49.2	-2.2	84	1968	1999
765	Caen	49.2	-0.5	78	1974	2010
766	Saarbruecken	49.2	7.1	325	1982	1998
767	Kasprowy	49.2	20	1991	1964	2017
769	Vancouver, British Columbia	49.3	-123.3	50	1959	1986
770	Creil	49.3	2.5	88	2009	2019
771	Reims	49.3	4	95	1975	2010
772	Zakopane	49.3	20	857	1964	2019
773	Mannheim	49.5	8.6	106	1979	1998
774	Nuernberg	49.5	11.1	312	1977	1998
775	Summerland	49.6	-119.7	454	1961	1988
776	Kosetice	49.6	15.1	534	1996	2019
777	Muren	49.6	100.2	1288	1964	2018
778	Saint-Quentin	49.8	3.2	98	1974	2019
779	Trier	49.8	6.7	278	1959	2019
780	Wuerzburg	49.8	10	275	1962	2019
781	Ostrava-Poruba	49.8	18.2	242	1986	2019
782	Ulaangom	49.8	92.1	934	1964	2018
783	Winnipeg Int. Airpt.	49.9	-97.2	240	1950	1986
784	St.Hubert	50	5.4	563	1968	2005
785	Geisenheim	50	8	131	1977	1998		Yes
786	Praha / (Prag-Karlov)	50.1	14.4	262	1986	2019		Yes
787	Regina	50.2	-104.3	587	1995	2011
788	Sept Iles	50.2	-66.3	53	1974	1994
789	Camborne	50.2	-5.3	88	1964	2016
790	Hradec Kralove	50.2	15.8	241	1953	2017
791	Suffield	50.3	-111.2	775	1961	1989
792	Swift Current	50.3	-107.7	825	1961	1993
793	Coburg	50.3	11	357	1982	1998
794	Hradec Kralove	50.3	15.9	241	1953	2019
795	Kiev-Borispol	50.3	31	121	1964	2019
796	Heihe	50.3	127.5	166	1962	2013
797	Fichtelberg	50.4	13	1214	1964	1995		Yes
798	Semipalatinsk	50.4	80.3	206	1964	1991
799	Giessen	50.6	8.7	201	1982	1998
800	Port Hardy	50.7	-127.4	23	1968	1994
801	Efford	50.7	-1.6	16	1960	1975
802	Bonn	50.7	7.2	65	1977	1996
803	Uccle	50.8	4.4	105	1961	2011
804	Beek / Limburg	50.9	5.8	114	1978	2014
805	Melle	51	3.8	15	1968	2007		Yes
806	Crawley	51.1	-0.2	144	1981	1991
807	Dresden / Wahnsdorf	51.1	13.7	271	1964	2019		Yes
808	Kyiv	51.1	25.9	0	1994	2019
809	Odiham	51.2	-1	124	1958	2016
810	Oostende / Airpt.	51.2	2.9	5	1969	2007
811	Luedenscheid	51.2	7.6	465	1987	1997
812	Bad Lake	51.3	-108.4	637	1972	1985
813	East Malling	51.3	0.5	37	1964	1975
814	Kassel	51.3	9.5	237	1980	1998
815	Bracknell	51.4	-0.8	74	1966	2000
816	Pulawy	51.4	22	147	1965	1978
817	Kew	51.5	-0.3	5	1951	1979	[Sanchez-Lorenzo et al. 2013, 2015]-Integeate-1299	Yes
818	Vlissingen	51.5	3.6	8	1978	2014		Yes
819	Gelsenkirchen	51.5	7.1	63	1976	1991
820	Wallingford	51.6	-1.2	49	1964	1975
821	Garston	51.7	-0.4	77	1957	1975
822	Braunlage	51.7	10.6	615	1958	1998
823	Garston	51.8	-0.4	77	1963	1975
824	Hoddesdon	51.8	0	47	1965	1975
825	Bocholt	51.8	6.5	24	1974	1997
826	Bad Lippspringe	51.8	8.8	162	1982	1998
827	Belsk	51.8	20.8	180	1970	2019
828	St. James, C.	51.9	-131	92	1969	1989
829	Valentia	51.9	-10.3	30	1964	2019
830	Grendon Underwood	51.9	-1	70	1964	1975
833	Wageningen	52	5.7	7	1928	2006	[Sanchez-Lorenzo et al. 2013, 2015]-Integeate-2867	Yes
831	Silsoe	52	-0.4	59	1958	1978
832	Cabauw	52	4.9	0	2006	2020
834	Chita	52	113.3	671	1964	2011
835	Aberporth	52.1	-4.6	134	1960	2016
836	Wattisham	52.1	1	91	2007	2016
837	De Bilt	52.1	5.2	40	1958	2014
838	Brwinow	52.1	20.7	110	1964	1978
839	Lindenberg	52.2	14.1	98	1991	2019
840	Dublin City	52.3	-6.3	20	1975	1987
841	Osnabrueck	52.3	8.1	104	1980	1998
842	Braunschweig	52.3	10.5	81	1959	2019		Yes
843	Warszawa	52.3	21	130	1964	2019		Yes
844	Irkutsk	52.3	104.4	467	1964	2018
845	Potsdam	52.4	13.1	33	1937	2005
846	Kilkenny	52.7	-7.3	64	1969	2008
847	Hemsby	52.7	1.7	13	1984	2000
848	De Kooy	52.9	4.8	0	1978	2014
849	Petropavlovsk-Kamchatski	53	158.8	32	1964	2012
850	Birr	53.1	-7.9	72	1971	2011
851	Eelde	53.1	6.6	4	1978	2014
852	Bremen	53.1	8.8	24	1976	1998
853	Waddington	53.2	-0.5	73	2006	2016
854	Goose	53.3	-60.5	46	1961	1992
855	Kuibyshew	53.3	50.5	137	1964	2017
856	Dublin Airport	53.4	-6.3	85	1976	2019
857	Mohe	53.5	122.4	296	1997	2015	[Yang et al. 2018]-Integeate-50136	Yes
858	Edmonton / Stony Plain	53.6	-114.1	767	1951	1998
859	Aughton	53.6	-2.9	55	1984	1995
860	Hamburg UV-B	53.6	10	14	1964	2019
861	Norderney	53.7	7.2	29	1967	1998
862	Hamburg	53.7	10.1	49	1950	2010
863	Fairfield	53.8	-2.9	24	1959	1975
864	Cawood	53.8	-1.1	6	1959	1975
865	Mikolajki	53.8	21.6	140	1966	1978
866	Prince George	53.9	-122.7	676	1974	1994
867	The Pas	54	-101.1	272	1973	1994
868	Suwalki	54.1	23	172	1964	1978
869	Belmullet	54.2	-10	10	1982	2019
870	Clones	54.2	-7.2	86	1982	2016
871	Heiligendamm	54.2	11.9	21	1964	1996
872	Kolobrzeg	54.2	15.6	16	1964	2017		Yes
873	Schleswig	54.5	9.6	59	1981	1998
874	Gdynia	54.5	18.6	13	1964	1978
875	Aldergrove -Airpt. (Belfast)	54.7	-6.2	81	1969	2016
876	Kaunas	54.8	23.9	73	1964	1991
877	Omsk	54.9	73.4	119	1964	2018
878	Annette	55	-131.6	34	1955	1973
879	List	55	8.4	33	1973	1998
880	Beaverlodge	55.2	-119.4	762	1961	1994
881	Eskdalemuir	55.3	-3.2	242	1956	2016
882	Malin Head,C.	55.4	-7.3	25	1982	2017
883	Hojbakkegaard, Kopenhagen	55.7	12.3	28	1956	2001
884	Lund	55.7	13.2	73	1989	2019
885	Moscow Univ. 1	55.7	37.2	192	1964	2019
886	Moscow Univ. 2	55.7	37.5	192	1964	2019
887	EDINBURGH	55.9	-3.4	57	1968	2016
888	Rucava	56.2	21.2	18	1994	2017
889	Dunstaffnage	56.5	-5.4	3	1971	2016
890	Dundee / Mylnefield	56.5	-3.1	30	1968	2013		Yes
891	Zilani	56.5	25.9	107	1991	2009
892	Ekaterinburg	56.8	60.6	237	1964	2018
893	Vaexjoe / Kronoberg	56.9	14.7	182	1983	2019		Yes
894	Aviemore	57.2	-3.8	220	1987	2016
895	Aberdeen	57.2	-2.1	35	1968	2016
896	Goeteborg	57.7	12	5	1989	2019
897	Visby - Aerolog. Station	57.7	18.4	51	1983	2019
898	Kuujjuaq / Fort Chimo	58.1	-68.4	36	1973	1994
899	Toravere	58.3	26.5	70	1955	2019
900	Inukjuak	58.5	-78.1	5	1973	1994
901	Norrkoepping	58.6	16.2	5	1989	2019
902	Fort Nelson	58.8	-122.6	378	1972	1995
903	Karlstad	59.4	13.5	46	1983	2019
904	Stockholm	59.4	18	24	1923	2019
905	Okhotsk	59.4	143.2	8	1964	1991
906	Svenska Hogarna	59.5	19.5	10	2010	2019
907	Fort Smith	60	-111.9	203	1972	1985
908	St. Petersburg / Voeikovo	60	30.3	4	1964	1995
909	Lerwick	60.1	-1.2	82	1952	2015
910	Helsinki-Ilmala	60.2	24.9	45	1958	2015
911	Helsinki-Kaisaniemi	60.2	25	9	1958	2016
912	Helsinki - Airport	60.3	25	53	1958	2016
913	Vanavara	60.3	102.3	259	1964	1995
914	Bergen	60.4	5.3	45	1967	2013
915	Borlaenge	60.4	15.5	153	1989	2019
916	Aleksandrovskoe	60.4	77.9	47	1964	1989
917	Whitehorse	60.7	-135.1	703	1971	1992
918	Bethel	60.8	-161.8	49	1952	1972
919	Jokioinen	60.8	23.5	104	1958	2016
920	Fort Simpson	61.9	-121.4	129	1955	1965
921	Yakutsk	62.1	129.8	103	1964	2018
922	Luonetjarvi	62.4	25.7	140	1958	2016
923	Oestersund	63.2	14.5	876	1983	2019
924	Oimyakon	63.3	143.2	726	1964	2017
925	Iqaluit	63.8	-68.6	20	1974	1994
926	Umea	63.8	20.2	10	1989	2019
927	Reykjavik	64.1	-21.9	52	1957	2017
928	Arkhangelsk	64.6	40.5	13	1964	1997
929	Fairbanks	64.8	-147.9	138	1950	1982
930	Lulea	65.6	22.1	16	1966	2017
931	Turukhansk	65.8	88	32	1964	1995
932	Sodankyla	67.4	26.6	178	1958	2015
933	Verkhoyansk	67.6	133.4	137	1964	2003
934	Kiruna	67.9	20.2	505	1970	2017
935	Olenek	68.5	112.4	127	1964	1989
936	Wrangle Is.	71	-178.5	2	1964	1994
937	Dickson Is.	73.5	80.4	47	1964	1988
938	Resolute	74.7	-95	67	1964	1985
939	Kotelny Is.	76	137.9	11	1964	1987
940	Fedorov Observatory	77.7	104.3	13	1964	1988
941	Ny-Aalesund, Spitsbergen	78.9	11.9	12	1982	2020
942	Eureka	80	-85.9	10	1972	2011
943	Krenkel Observatory	80.6	58.1	21	1964	1988
944	Alert	82.5	-62.4	127	1967	2013
